# Supplementary material for: Construction of the septahydroxylated ABC-ring system of dihydro-β-agarofurans: application of 6-exo-dig radical cyclization
Source: Royal Society of Chemistry journal article supplement (doi:10.1039/c7cc00507e), 2017-01-01

*Supporting Information*

**Construction of the septahydroxylated ABC-ring system of  
dihydro- $\beta$ -agarofurans: application of 6-*exo-dig* radical cyclization**

Hiroki Fujisawa, Tomochika Ishiyama, Daisuke Urabe and Masayuki Inoue\*

*Graduate School of Pharmaceutical Sciences*

*The University of Tokyo, Hongo, Bunkyo-ku, Tokyo 113-0033, Japan*

*Fax: (+81)3-5841-0568*

*E-mail: inoue@mol.f.u-tokyo.ac.jp*

Supporting Information

34 pages

|                                                                             |      |
|-----------------------------------------------------------------------------|------|
| Contents:                                                                   | page |
| Experimental procedures                                                     | S2   |
| $^1\text{H}$ and $^{13}\text{C}$ NMR spectra of newly synthesized compounds | S20  |

**General methods.**

All reactions sensitive to air or moisture were carried out in dry solvents under argon atmosphere, unless otherwise noted. THF, CH<sub>2</sub>Cl<sub>2</sub>, toluene, DMF and Et<sub>2</sub>O were purified by Glass Contour solvent dispensing system (Nikko Hansen & Co., Ltd., Osaka, Japan). All other reagents were used as supplied unless otherwise noted. Analytical thin-layer chromatography (TLC) was performed using E. Merck Silica gel 60 F254 pre-coated plates (0.25 mm). Flash chromatography was performed using 40-50  $\mu$ m Silica Gel 60N (Kanto Chemical Co., Inc.). Melting points were measured on Yanaco MP-J3 micro melting point apparatus, and are uncorrected. Optical rotations were measured on a JASCO P-2200 Digital Polarimeter at room temperature using the sodium D line. Infrared (IR) spectra were recorded as a thin film on a KBr disk using JASCO FT/IR-4100 spectrometer. <sup>1</sup>H and <sup>13</sup>C NMR spectra were recorded on JEOL JNM-ECX-500, JNM-ECA-500 or JNM-ECS-400 spectrometer at room temperature. Chemical shifts were reported in ppm on the  $\delta$  scale relative to CHCl<sub>3</sub> ( $\delta$  = 7.26 for <sup>1</sup>H NMR), C<sub>6</sub>D<sub>5</sub>H ( $\delta$  = 7.16 for <sup>1</sup>H NMR) and CDCl<sub>3</sub> ( $\delta$  = 77.0 for <sup>13</sup>C NMR) as internal references. Signal patterns are indicated as s, singlet; d, doublet; t, triplet; q, quartet; m, multiplet; br, broaden peak. The numbering of compounds corresponds to that of dihydro- $\beta$ -agarofurans. High resolution mass spectra were measured on JEOL JMS-T100LP (ESI-TOF).

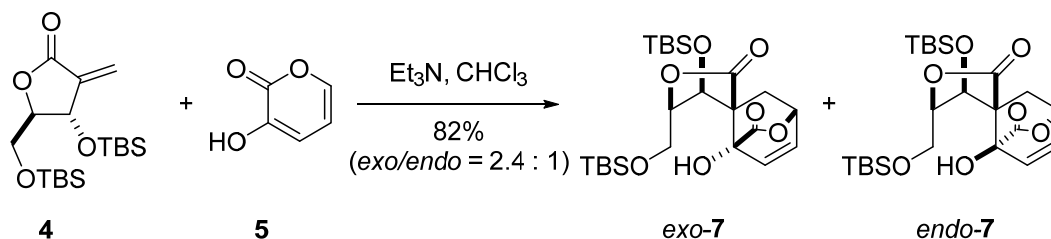

**Diels-Alder adducts 7.** Et<sub>3</sub>N (1.80 mL, 12.9 mmol) was added to a solution of dienophile **4** (4.82 g, 12.9 mmol) and diene **5** (1.44 g, 12.9 mmol) in CHCl<sub>3</sub> (26 mL) at room temperature. The reaction mixture was stirred at room temperature for 2 h and then concentrated. The residue was purified by flash column chromatography on silica gel (60 g, hexane/EtOAc 8/1) to afford a 2.4 : 1 mixture of *exo*-**7** and *endo*-**7** (5.13 g, 10.6 mmol) in 82% yield. For characterizations of *exo*-**7** and *endo*-**7**, a small amount of the mixture was purified by flash column chromatography on silica gel. The structure of *exo*-**7** and *endo*-**7** were assigned as shown in page S4. *exo*-**7**: white solid; m.p. 121-125 °C; [ $\alpha$ ]<sub>D</sub><sup>27</sup> 20 (*c* 1.2, CHCl<sub>3</sub>); IR (film)  $\nu$  2954, 2930, 2886, 2858, 1780, 1472, 1464, 1362, 1257, 1230, 1190, 1134, 1107, 1070, 1052, 941 cm<sup>-1</sup>; <sup>1</sup>H NMR (400 MHz, CDCl<sub>3</sub>)  $\delta$  0.085 (3H, s, CH<sub>3</sub> of TBS), 0.089 (6H, s, CH<sub>3</sub> of TBS x2), 0.15 (3H, s, CH<sub>3</sub> of TBS), 0.86 (9H, s, *t*-Bu of TBS), 0.91 (9H, s, *t*-Bu of TBS), 2.35 (1H, dd, *J* = 13.7, 3.6 Hz, H9a), 2.68 (1H, dd, *J* = 13.7, 1.8 Hz, H9b), 3.84 (1H, dd, *J* = 11.9, 4.1 Hz, H3a), 3.87 (1H, s, OH), 3.98 (1H, dd, *J* = 11.9, 4.1 Hz, H3b), 4.07 (1H, ddd, *J* = 5.5,

4.1, 4.1 Hz, H2), 4.73 (1H, d,  $J = 5.5$  Hz, H1), 5.33 (1H, dddd,  $J = 5.0, 3.6, 1.8, 1.8$  Hz, H8), 6.33 (1H, dd,  $J = 7.8, 1.8$  Hz, H6), 6.50 (1H, dd,  $J = 7.8, 5.0$  Hz, H7);  $^{13}\text{C}$  NMR (100 MHz,  $\text{CDCl}_3$ )  $\delta$  -5.42, -5.35, -4.4, -4.1, 17.9, 18.3, 25.75, 25.80, 32.5, 53.0, 60.8, 69.0, 72.9, 76.4, 85.2, 132.5, 135.3, 173.1, 176.2; HRMS (ESI) calcd for  $\text{C}_{23}\text{H}_{40}\text{O}_7\text{Si}_2\text{Na}$   $[\text{M}+\text{Na}]^+$  507.2205, found 507.2180. *endo-7*: white solid; m.p. 124-130 °C;  $[\alpha]_{\text{D}}^{27}$  15 ( $c$  1.1,  $\text{CHCl}_3$ ); IR (film)  $\nu$  3462, 2953, 2931, 2888, 2858, 1760, 1469, 1391, 1362, 1255, 1192, 1133, 1071, 1006, 977, 940  $\text{cm}^{-1}$ ;  $^1\text{H}$  NMR (400 MHz,  $\text{CDCl}_3$ )  $\delta$  0.09 (3H, s,  $\text{CH}_3$  of TBS), 0.10 (3H, s,  $\text{CH}_3$  of TBS), 0.12 (3H, s,  $\text{CH}_3$  of TBS), 0.13 (3H, s,  $\text{CH}_3$  of TBS), 0.90 (9H, s, *t*-Bu of TBS), 0.91 (9H, s, *t*-Bu of TBS), 1.79 (1H, d,  $J = 13.3$  Hz, H9a), 3.16 (1H, dd,  $J = 13.3, 4.6$  Hz, H9b), 3.87 (1H, s, OH), 3.89 (1H, dd,  $J = 12.4, 3.7$  Hz, H3a), 3.98 (1H, dd,  $J = 12.4, 2.5$  Hz, H3b), 4.04 (1H, ddd,  $J = 6.0, 3.7, 2.5$  Hz, H2), 4.72 (1H, d,  $J = 6.0$  Hz, H1), 5.33 (1H, m, H8), 6.53 (1H, dd,  $J = 7.8, 5.3$  Hz, H7), 6.59 (1H, dd,  $J = 7.8, 2.0$  Hz, H6);  $^{13}\text{C}$  NMR (100 MHz,  $\text{CDCl}_3$ )  $\delta$  -5.5, -5.4, -5.2, -4.1, 18.1, 18.3, 25.8, 25.9, 32.5, 51.9, 60.8, 67.5, 74.0, 76.1, 84.5, 130.0, 136.9, 172.9, 174.5; HRMS (ESI) calcd for  $\text{C}_{23}\text{H}_{40}\text{O}_7\text{Si}_2\text{Na}$   $[\text{M}+\text{Na}]^+$  507.2205, found 507.2193.

**Structural assignment of Diels-Alder adducts 7.**

Treatment of a 2.4 : 1 mixture of *exo/endo* 7 at 140 °C gave compound 8 as a single product through the thermal CO<sub>2</sub> loss. This conversion confirmed the formation of 7, because other possible adducts *exo/endo*-S4, S5 and S6 should afford the different compounds S1, S2 and S3, respectively.

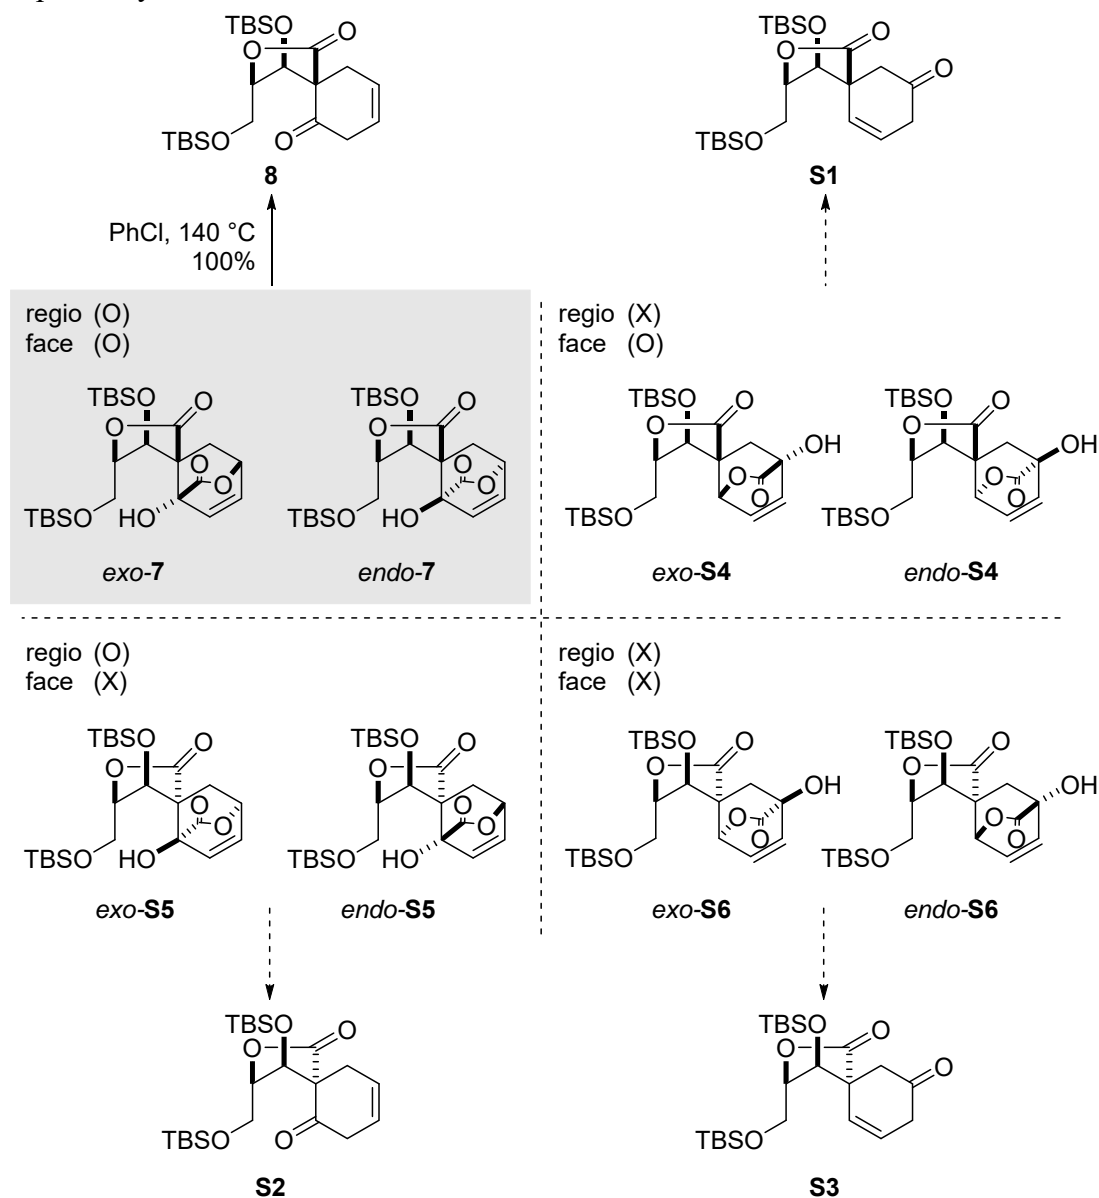

The structure of *exo*-7 was assigned by the following derivatization into tricycle S7.

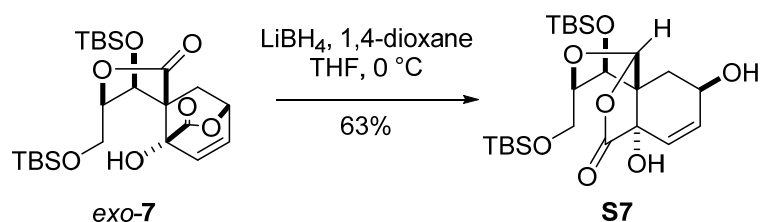

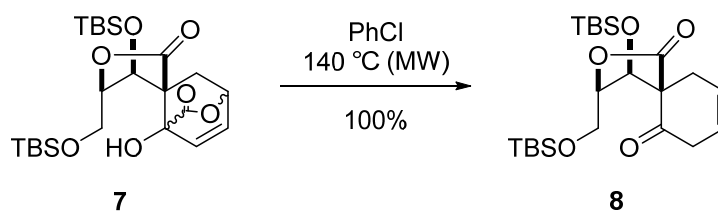

**Ketone 8.** A 20 mL Pyrex vessel was charged with compound **7** (a 2.4 : 1 mixture, 5.13 g, 10.6 mmol) and chlorobenzene (10 mL). The solution was degassed by freeze-thaw procedure (x3), and then was heated at 140 °C with microwave at normal absorption. The reaction mixture was stirred at 140 °C for 1 h, cooled to room temperature and concentrated. The residue was purified by flash column chromatography on silica gel (100 g, hexane/EtOAc 18/1) to afford ketone **8** (4.67 g, 10.6 mmol) in 100% yield: white solid; m.p. 62-68 °C;  $[\alpha]_{\text{D}}^{26}$  35 (*c* 1.1, CHCl<sub>3</sub>); IR (film)  $\nu$  2954, 2931, 2888, 2858, 1781, 1720, 1470, 1391, 1256, 1165, 1144, 1118, 1096, 1066, 1008, 986, 941 cm<sup>-1</sup>; <sup>1</sup>H NMR (400 MHz, CDCl<sub>3</sub>)  $\delta$  0.03 (3H, s, CH<sub>3</sub> of TBS), 0.05 (3H, s, CH<sub>3</sub> of TBS), 0.07 (3H, s, CH<sub>3</sub> of TBS), 0.16 (3H, s, CH<sub>3</sub> of TBS), 0.87 (9H, s, *t*-Bu of TBS), 0.89 (9H, s, *t*-Bu of TBS), 2.62 (1H, brd, *J* = 19.7 Hz, H9a), 2.94 (1H, brd, *J* = 18.3 Hz, H6a), 2.97 (1H, brd, *J* = 19.7 Hz, H9b), 3.38 (1H, brd, *J* = 18.3 Hz, H6b), 3.77 (1H, dd, *J* = 11.9, 4.1 Hz, H3a), 3.84 (1H, dd, *J* = 11.9, 3.7 Hz, H3b), 4.14 (1H, ddd, *J* = 6.4, 4.1, 3.7 Hz, H2), 5.10 (1H, d, *J* = 6.4 Hz, H1), 5.80 (1H, d, *J* = 11.0 Hz, H6 or H7), 5.83 (1H, d, *J* = 11.0 Hz, H6 or H7); <sup>13</sup>C NMR (100 MHz, CDCl<sub>3</sub>)  $\delta$  -5.50, -5.47, -5.0, -4.8, 17.9, 18.2, 25.6, 25.8, 28.4, 39.3, 60.2, 60.6, 68.2, 83.8, 123.3, 124.0, 172.5, 203.3; HRMS (ESI) calcd for C<sub>22</sub>H<sub>40</sub>O<sub>5</sub>Si<sub>2</sub>Na 463.2306 [M+Na]<sup>+</sup>, found 463.2285.

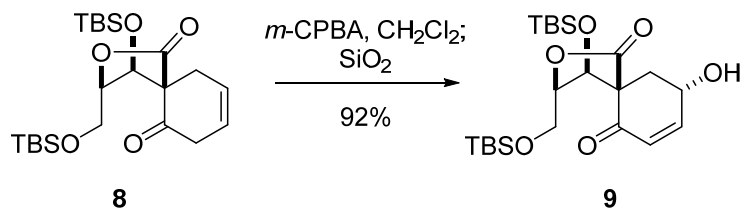

**Enone 9.** *m*-CPBA (77% purity, 3.56 g, 15.9 mmol) was added to a solution of ketone **8** (4.67 g, 10.6 mmol) in CH<sub>2</sub>Cl<sub>2</sub> (106 mL) at room temperature. The reaction mixture was stirred at room temperature for 18 h, and then *m*-CPBA (77% purity, 1.56 g, 6.96 mmol) was added. The reaction mixture was stirred at room temperature for 4 h, and then saturated aqueous NaHCO<sub>3</sub> (40 mL) and saturated aqueous Na<sub>2</sub>S<sub>2</sub>O<sub>3</sub> (40 mL) were successively added. The resultant solution was extracted with CH<sub>2</sub>Cl<sub>2</sub> (50 mL x3), and the combined organic layers were dried over Na<sub>2</sub>SO<sub>4</sub>, filtered and concentrated. The residue was treated with silica gel (80 g) for 12 h at room temperature and eluted with EtOAc (1 L). Concentration of the solution afforded enone **9** (4.45 g, 9.74 mmol) in 92% yield. The C8-configuration was determined by the modified Mosher method as described page S6: white solid; m.p. 103-108 °C;  $[\alpha]_{\text{D}}^{28}$  0.41 (*c* 1.0, CHCl<sub>3</sub>); IR (film)  $\nu$  3484, 2954, 2931, 2888, 2859, 1774, 1684,

1470, 1408, 1390, 1363, 1325, 1257, 1235, 1142, 1121, 1069, 1034, 1011, 949  $\text{cm}^{-1}$ ;  $^1\text{H}$  NMR (400 MHz,  $\text{CDCl}_3$ )  $\delta$  -0.04 (3H, s,  $\text{CH}_3$  of TBS), 0.06 (3H, s,  $\text{CH}_3$  of TBS), 0.08 (3H, s,  $\text{CH}_3$  of TBS), 0.12 (3H, s,  $\text{CH}_3$  of TBS), 0.86 (9H, s, *t*-Bu of TBS), 0.90 (9H, s, *t*-Bu of TBS), 2.18 (1H, dd,  $J = 13.7, 11.0$  Hz, H9a), 2.19 (1H, d,  $J = 5.9$  Hz, OH), 2.41 (1H, ddd,  $J = 13.7, 5.3, 1.8$  Hz, H9b), 3.80 (1H, dd,  $J = 12.4, 3.7$  Hz, H3a), 4.01 (1H, dd,  $J = 12.4, 1.8$  Hz H3b), 4.17 (1H, ddd,  $J = 7.8, 3.7, 1.8$  Hz, H2), 4.96 (1H, m, H8), 5.37 (1H, d,  $J = 7.8$  Hz, H1), 6.13 (1H, dd,  $J = 10.5, 2.1$  Hz, H6), 7.07 (1H, ddd,  $J = 10.5, 2.1, 1.8$  Hz, H7);  $^{13}\text{C}$  NMR (100 MHz,  $\text{CDCl}_3$ )  $\delta$  -5.5, -5.4, -5.3, -4.5, 17.8, 18.2, 25.6, 25.7, 33.1, 58.4, 60.1, 64.5, 68.6, 83.3, 128.2, 154.8, 171.7, 192.0; HRMS (ESI) calcd for  $\text{C}_{22}\text{H}_{40}\text{O}_6\text{Si}_2\text{Na}$   $[\text{M}+\text{Na}]^+$  479.2256, found 479.2234.

### Determination of the C8-configuration.

The C8-configuration of **8** was determined to be *S* by the modified Mosher method.<sup>S1</sup> (*S*)- and (*R*)-MTPA esters **S8** and **S9** were synthesized by treatment of **8** with (*R*)- and (*S*)-MTPACl, respectively.

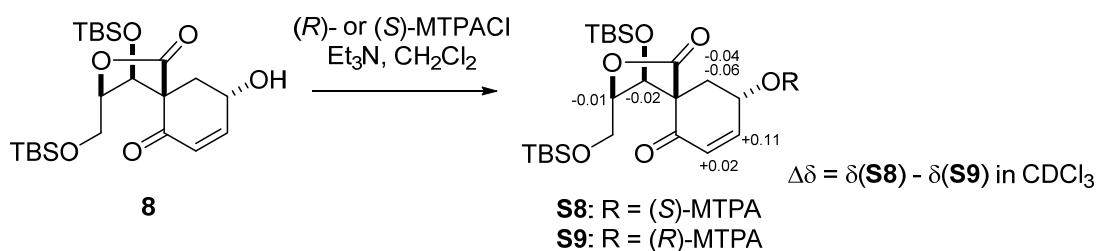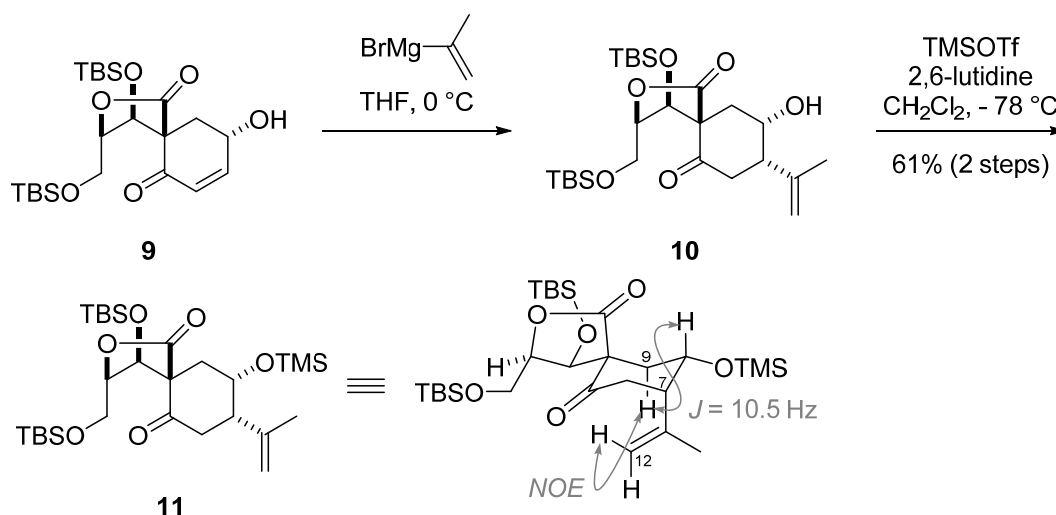

**Ketone 11.** Isopropenylmagnesium bromide (0.5 M in THF, 55.0 mL, 27.5 mmol) was added to a solution of enone **9** (4.22 g, 9.24 mmol) in THF (92 mL) at  $-78^\circ\text{C}$ . The reaction mixture was warmed to  $0^\circ\text{C}$  and stirred for 10 min, and then poured into pH 7 phosphate buffer (150 mL). The resultant solution was extracted with EtOAc (200 mL x3), and the

combined organic layers were dried over  $\text{Na}_2\text{SO}_4$ , filtered and concentrated to afford the crude ketone **10**, which was used in the next reaction without further purification.

TMSOTf (2.50 mL, 13.8 mmol) was added to a solution of the above crude ketone **10** and 2,6-lutidine (3.20 mL, 27.5 mmol) in  $\text{CH}_2\text{Cl}_2$  (92 mL) at  $-78\text{ }^\circ\text{C}$ . The reaction mixture was stirred at  $-78\text{ }^\circ\text{C}$  for 30 min, and then saturated aqueous  $\text{NH}_4\text{Cl}$  (100 mL) was added. The resultant solution was extracted with EtOAc (100 mL x3), and the combined organic layers were dried over  $\text{Na}_2\text{SO}_4$ , filtered and concentrated. The residue was purified by flash column chromatography on silica gel (100 g, hexane/EtOAc 100/1) to afford ketone **11** (3.23 g, 5.66 mmol) in 61% yield over 2 steps. The C7-configuration was determined by the NOE correlation between  $\alpha$ -H9 and H12 of **11**: white solid; m.p.  $87.0\text{--}88.0\text{ }^\circ\text{C}$ ;  $[\alpha]_{\text{D}}^{22}$   $-4.6$  ( $c$  1.0,  $\text{CHCl}_3$ ); IR (film)  $\nu$  2954, 2931, 2895, 2858 1767, 1712, 1647, 1559, 1536, 1512, 1467, 1406, 1326, 1254, 1149, 1118, 1088, 1015  $\text{cm}^{-1}$ ;  $^1\text{H}$  NMR (400 MHz,  $\text{CDCl}_3$ )  $\delta$  0.01 (3H, s,  $\text{CH}_3$  of TBS), 0.04 (3H, s,  $\text{CH}_3$  of TBS), 0.07 (3H, s,  $\text{CH}_3$  of TBS), 0.13 (9H, s,  $\text{CH}_3$  of TMS), 0.14 (3H, s,  $\text{CH}_3$  of TBS), 0.86 (9H, s,  $t$ -Bu of TBS), 0.88 (9H, s,  $t$ -Bu of TBS), 1.82 (1H, ddd,  $J$  = 14.2, 4.1, 0.9 Hz, H9a), 1.85 (3H, s, H13), 2.41 (1H, dd,  $J$  = 14.2, 10.5 Hz, H9b), 2.69 (1H, dd,  $J$  = 16.0, 4.1 Hz, H6a), 2.94 (1H, m, H7), 3.11 (1H, dd,  $J$  = 16.0, 6.4 Hz, H6b), 3.77 (1H, dd,  $J$  = 12.4, 3.6 Hz, H3a), 3.96 (1H, dd,  $J$  = 12.4, 2.3 Hz, H3b), 4.09 (1H, ddd,  $J$  = 7.8, 3.6, 2.3 Hz, H2), 4.59 (1H, s, H12a), 4.79 (1H, ddd,  $J$  = 10.5, 8.7, 4.1 Hz, H8), 4.94 (1H, s, H12b) 5.24 (1H, d,  $J$  = 7.8 Hz, H1);  $^{13}\text{C}$  NMR (100 MHz,  $\text{CDCl}_3$ )  $\delta$  -5.5, -5.4, -5.0, -4.5, -0.1, 17.8, 18.2, 25.4, 25.70, 25.73, 31.3, 42.7, 46.2, 60.1, 60.8, 67.2, 67.8, 83.2, 114.1, 145.4, 172.9, 203.6; HRMS (ESI) calcd for  $\text{C}_{28}\text{H}_{54}\text{O}_6\text{Si}_3\text{Na}$  593.3120  $[\text{M}+\text{Na}]^+$ , found 593.3097.

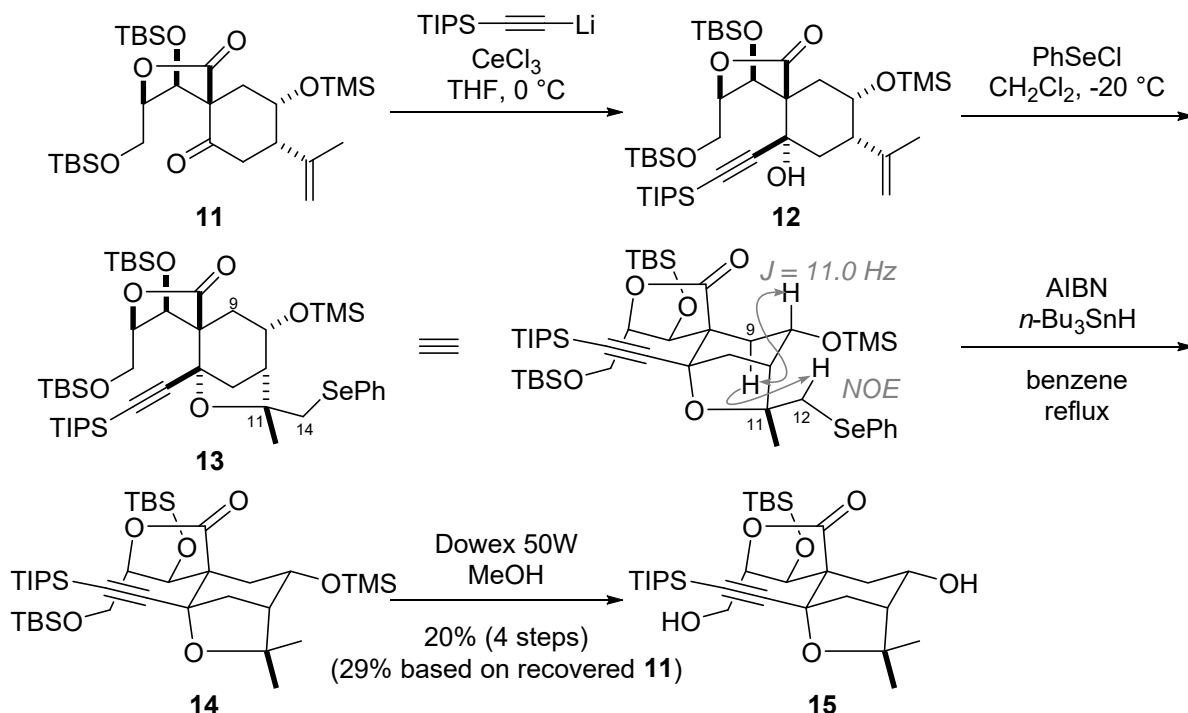

**Diol 15.**  $n\text{-BuLi}$  (1.6 M in hexane, 18 mL, 29.0 mmol) was added to a solution of triisopropylsilyl acetylene (7.0 mL, 31 mmol) in THF (35 mL) at  $-78^\circ\text{C}$ . The reaction mixture was stirred at  $-78^\circ\text{C}$  for 15 min, and then anhydrous  $\text{CeCl}_3$  (0.6 M in THF, 48 mL, 29.0 mmol), which was prepared according to the reported procedure,<sup>S2</sup> was added. The resultant mixture was at  $-78^\circ\text{C}$  for 1 h, and then a solution of ketone **11** (3.63 g, 6.36 mmol) in THF (5 mL) was added. The reaction mixture was warmed to  $0^\circ\text{C}$  and stirred for 1 h, and then saturated aqueous  $\text{NH}_4\text{Cl}$  (100 mL) was added. The resultant solution was extracted with EtOAc (100 mL x3). The combined organic layers were dried over  $\text{Na}_2\text{SO}_4$ , filtered and concentrated. The residue was purified by flash column chromatography on silica gel (60 g, hexane/EtOAc 100/1) to afford the unreacted ketone **11** (1.10 g, 1.93 mmol) and the crude alcohol **12**, which was used in the next reaction without further purification.

PhSeCl (914 mg, 4.77 mmol) was added to a solution of the above crude alcohol **12** in  $\text{CH}_2\text{Cl}_2$  (32 mL) at  $-20^\circ\text{C}$ . The reaction mixture was stirred at  $-20^\circ\text{C}$  for 10 min, and then saturated aqueous  $\text{NaHCO}_3$  (15 mL) and saturated aqueous  $\text{Na}_2\text{S}_2\text{O}_3$  (15 mL) were successively added. The resultant solution was extracted with EtOAc (20 mL x3), and the combined organic layers were dried over  $\text{Na}_2\text{SO}_4$ , filtered and concentrated to afford the crude selenide **13**, which was used in the next reaction without further purification. The C11-configuration was determined by the NOE correlation between  $\alpha\text{-H}_9$  and  $\text{H}_{12}$  of the pure selenide **13**, which was obtained by PTLC purification of a small amount of the crude selenide **13**. Selenide **13**:  $^1\text{H}$  NMR (400 MHz,  $\text{C}_6\text{D}_6$ )  $\delta$  0.13 (9H, s,  $\text{CH}_3$  of TMS x3), 0.18 (3H, s,  $\text{CH}_3$  of TBS), 0.19 (3H, s,  $\text{CH}_3$  of TBS), 0.22 (3H, s,  $\text{CH}_3$  of TBS), 0.36 (3H, s,  $\text{CH}_3$  of TBS), 0.95 (9H, s,  $t\text{-Bu}$  of TBS), 1.00 (9H, s,  $t\text{-Bu}$  of TBS), 1.05-1.08 (3H, m,  $\text{CH}$  of TIPS x3), 1.12-1.16 (18H, m,  $\text{CH}_3$  of TIPS x 6), 1.47 (3H, s,  $\text{H}_{13}$ ), 1.90 (1H, dd,  $J = 14.6, 6.9\text{ Hz}$ ,

H9a), 2.34 (1H, m, H7), 2.53 (1H, dd,  $J = 13.2, 5.0$  Hz, H6a), 2.80 (1H, dd,  $J = 14.6, 11.0$  Hz, H9b), 3.20 (1H, d,  $J = 11.4$  Hz, H12a), 3.82 (1H, d,  $J = 13.2$  Hz, H6b), 3.97 (1H, dd,  $J = 12.4, 8.2$  Hz, H3a), 4.18-4.25 (3H, m, H2, H3 and H12b), 4.36 (1H, m, H8), 4.95 (1H, d,  $J = 7.8$  Hz, H1), 7.57 (3H, m, aromatic), 7.58 (2H, m, aromatic); HRMS (ESI) calcd for  $C_{45}H_{80}O_6Si_4Na$  931.4089  $[M+Na]^+$ , found 931.4106.

A solution of the above crude selenide **13**,  $n\text{-Bu}_3\text{SnH}$  (4.5 mL, 17 mmol) and AIBN (522 mg, 3.18 mmol) in benzene (32 mL) was degassed by freeze-thaw procedure (x3). The reaction mixture was heated to reflux, stirred for 2 h, cooled to room temperature and concentrated to afford the crude **14**, which was used in the next reaction without further purification.

Dowex-50W (2.4 g) was added to a solution of the above crude **14** in MeOH (32 mL) at room temperature. The reaction mixture was stirred at room temperature for 18 h, filtered and concentrated. The residue was purified by flash column chromatography [a column consecutively packed with silica gel (50 g) and 50% (w/w) KF contained silica gel (50 g), hexane/EtOAc 3/1] to afford diol **15** (721 mg, 1.27 mmol) in 20% yield over 4 steps. The yield was calculated to be 29% over 4 steps based on the recovered ketone **11**: white solid; m.p. 158.0-160.0 °C;  $[\alpha]_D^{17}$  32 ( $c$  0.50,  $\text{CHCl}_3$ ); IR (film)  $\nu$  3438, 2940, 2864, 2170, 1756, 1463, 1386, 1364, 1255, 1191, 1149, 1120, 1066, 1008, 938  $\text{cm}^{-1}$ ;  $^1\text{H}$  NMR (400 MHz,  $\text{CDCl}_3$ )  $\delta$  0.15 (3H, s,  $\text{CH}_3$  of TBS), 0.21 (3H, s,  $\text{CH}_3$  of TBS), 0.91 (9H, s,  $t\text{-Bu}$  of TBS), 1.05 (21H, br s, TIPS), 1.30 (3H, s,  $\text{CH}_3$ ), 1.51 (3H, s,  $\text{CH}_3$ ), 1.76 (1H, dd,  $J = 14.4, 6.6$  Hz, H9a), 2.14 (1H, dd,  $J = 5.5, 3.2$  Hz, H7), 2.47 (1H, dd,  $J = 13.0, 5.5$  Hz, H6a), 2.55 (1H, dd,  $J = 14.4, 11.7$  Hz, H9b), 3.33 (1H, d,  $J = 13.0$  Hz, H6b), 3.77 (1H, dd,  $J = 12.4, 5.3$  Hz, H3a), 3.98 (1H, dd,  $J = 12.4, 2.3$  Hz, H3b), 4.02 (1H, ddd,  $J = 7.8, 5.3, 2.3$  Hz, H2), 4.25 (1H, ddd,  $J = 11.7, 6.6, 3.2$  Hz, H8), 4.89 (1H, d,  $J = 7.8$  Hz, H1);  $^{13}\text{C}$  NMR (100 MHz,  $\text{CDCl}_3$ )  $\delta$  -4.5, -3.4, 11.0, 18.0, 18.5, 24.7, 25.9, 29.5, 31.5, 38.6, 48.9, 55.0, 61.2, 69.9, 71.9, 79.3, 82.3, 84.0, 88.0, 106.8, 175.3; HRMS (ESI) calcd for  $C_{30}H_{54}O_6Si_2Na$  589.3351  $[M+Na]^+$ , found 589.3328.

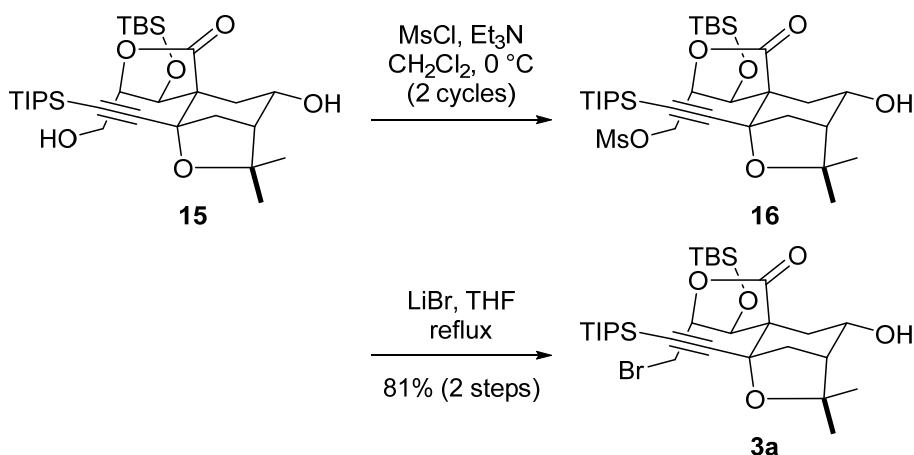

**Bromide 3a.** MsCl (57  $\mu$ L, 740  $\mu$ mol) was added to a solution of diol **15** (691 mg, 1.22 mmol) and Et<sub>3</sub>N (200  $\mu$ L, 1.44 mmol) in CH<sub>2</sub>Cl<sub>2</sub> (12 mL) at 0 °C. The reaction mixture was stirred at 0 °C for 5 min, and then saturated aqueous NH<sub>4</sub>Cl (15 mL) was added. The resultant solution was extracted with EtOAc (10 mL x3), and the combined organic layers were dried over Na<sub>2</sub>SO<sub>4</sub>, filtered and concentrated. The residue was purified by flash column chromatography on silica gel (15 g, CH<sub>2</sub>Cl<sub>2</sub>/EtOAc 35/1) to afford the crude mesylate **16** and the unreacted diol **15** (307 mg, 542  $\mu$ mol). According to the above procedure, the recovered diol **15** (307 mg, 542  $\mu$ mol) was mesylated by using MsCl (29  $\mu$ L, 370  $\mu$ mol) and Et<sub>3</sub>N (106  $\mu$ L, 761  $\mu$ mol) in CH<sub>2</sub>Cl<sub>2</sub> (5.5 mL). The residue was purified by flash column chromatography on silica gel (6 g, CH<sub>2</sub>Cl<sub>2</sub>/EtOAc 35/1) to give the crude mesylate **16** and the unreacted diol **15** (101 mg, 178  $\mu$ mol). The combined crude mesylate **16** was used in the next reaction without further purification.

LiBr (4.56 g, 52.5 mmol) was added to a solution of the above crude mesylate **16** in THF (11 mL) at room temperature. The reaction mixture was heated to reflux and stirred for 14 h. After the mixture was cooled to room temperature, saturated aqueous NaHCO<sub>3</sub> (12 mL) was added. The resultant solution was extracted with EtOAc (20 mL x3). The combined organic layers were dried over Na<sub>2</sub>SO<sub>4</sub>, filtered and concentrated. The residue was purified by flash column chromatography on silica gel (15 g, hexane/EtOAc 6/1) to afford bromide **3a** (622 mg, 987  $\mu$ mol) in 81% yield over 2 steps: white solid; m.p. 120.0-122.0 °C;  $[\alpha]_D^{30}$  23 (*c* 0.50, CHCl<sub>3</sub>); IR (film)  $\nu$  3437, 2941, 2892, 2864, 2169, 1774, 1463, 1387, 1366, 1318, 1294, 1256, 1221, 1192, 1149, 1119, 1065, 1037, 1009, 970, 922 cm<sup>-1</sup>; <sup>1</sup>H NMR (400 MHz, CDCl<sub>3</sub>)  $\delta$  0.18 (3H, s, CH<sub>3</sub> of TBS), 0.23 (3H, s, CH<sub>3</sub> of TBS), 0.92 (9H, s, *t*-Bu of TBS), 1.06 (21H, br s, TIPS), 1.30 (3H, s, CH<sub>3</sub>), 1.50 (3H, s, CH<sub>3</sub>), 1.75 (1H, dd, *J* = 14.2, 6.4 Hz, H9a), 2.14 (1H, dd, *J* = 5.3, 3.2 Hz, H7), 2.479 (1H, dd, *J* = 14.2, 11.4 Hz, H9b), 2.481 (1H, dd, *J* = 13.3, 5.3 Hz, H6a), 3.32 (1H, d, *J* = 13.3 Hz, H6b), 3.54 (1H, dd, *J* = 11.4, 7.1 Hz, H3a), 3.77 (1H, dd, *J* = 11.4, 2.7 Hz, H3b), 4.16 (1H, ddd, *J* = 7.1, 6.8, 2.7 Hz, H2), 4.27 (1H, ddd, *J* = 11.4, 6.4, 3.2 Hz, H8), 4.77 (1H, d, *J* = 6.8 Hz, H1); <sup>13</sup>C NMR (100 MHz, CDCl<sub>3</sub>)  $\delta$  -4.2, -3.4, 11.1, 18.0, 18.6, 24.7, 25.9, 29.9, 31.0, 31.4, 38.8, 48.9, 55.6, 69.9, 75.1, 79.2, 81.3, 84.3, 88.6,

106.9, 174.6; HRMS (ESI) calcd for  $C_{30}H_{53}BrO_5Si_2Na$  651.2507 and 653.2487  $[M+Na]^+$ , found 651.2487 and 653.2467.

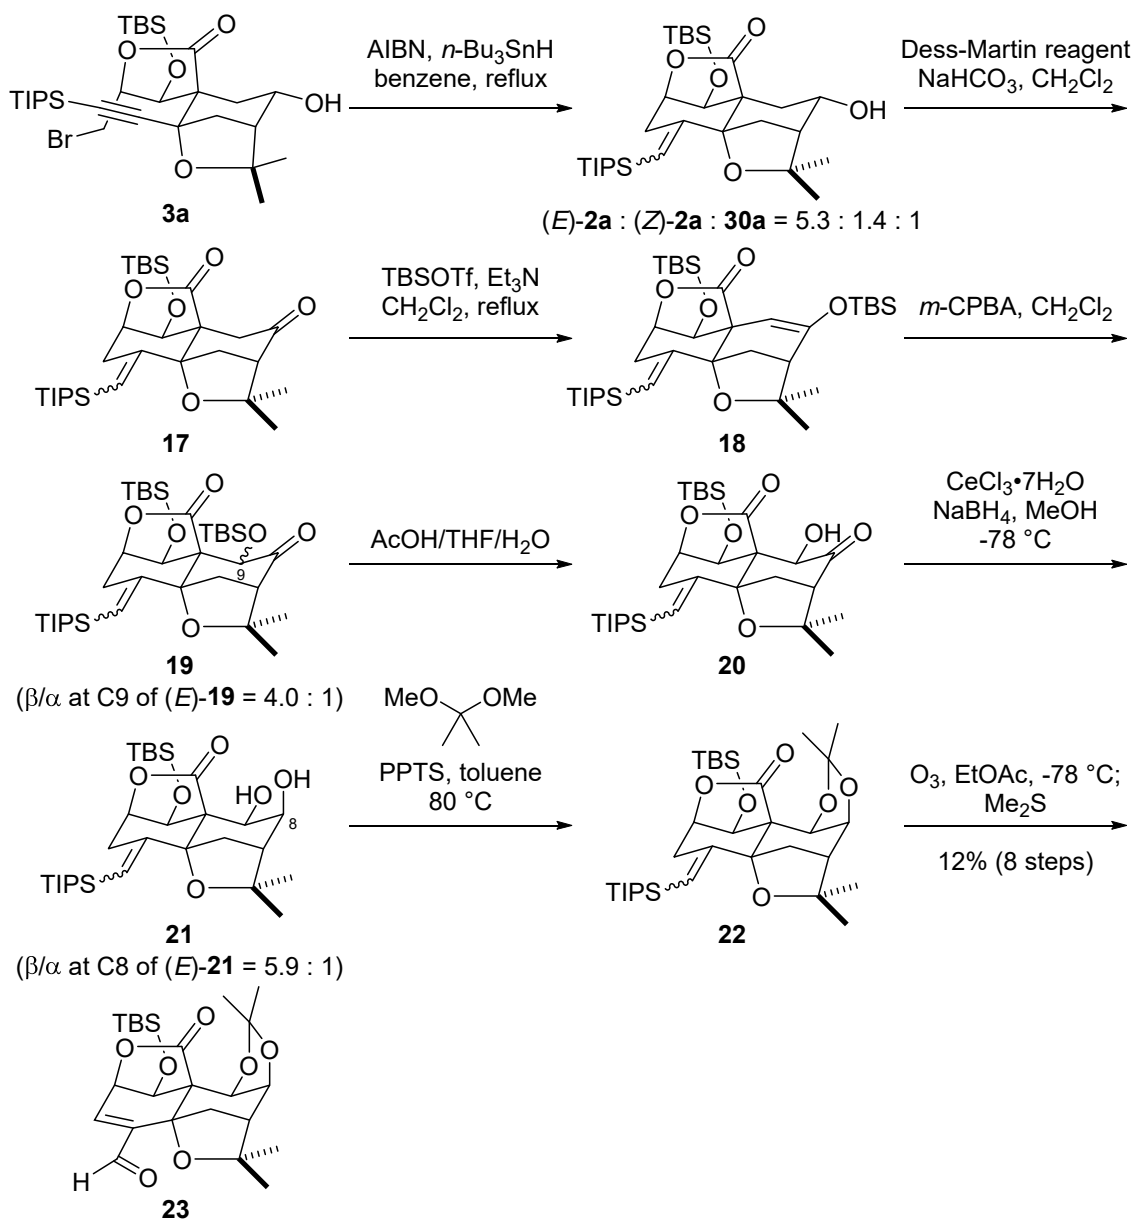

**Enal 23.** A solution of bromide **3a** (230 mg, 365  $\mu\text{mol}$ ) and AIBN (30.0 mg, 182  $\mu\text{mol}$ ) in benzene (34 mL) was degassed by freeze-thaw procedure (x3). The mixture was heated to reflux, and then a degassed solution of  $n\text{-Bu}_3\text{SnH}$  (980  $\mu\text{L}$ , 3.6 mmol) and AIBN (30.0 mg, 182  $\mu\text{mol}$ ) in benzene (2.5 mL) by freeze-thaw procedure (x3) was added over 30 min. After the addition was completed, the reaction mixture was stirred at the reflux temperature for further 1 h. The mixture was cooled to room temperature and concentrated. The residue was purified by flash column chromatography [a column consecutively packed with silica gel (5 g) and 50% (w/w) KF contained silica gel (5 g), hexane/EtOAc 10/1] to afford a 5.3 : 1.4 : 1 mixture of (E)-2a, (Z)-2a, and the 7-membered compound 30a, which was used in

the next reaction without further purification. The combined yield of (*E*)-**2a**, (*Z*)-**2a**, and **30a** was calculated to be 83% by <sup>1</sup>H NMR analysis of the crude mixture using CH<sub>2</sub>Br<sub>2</sub> as an internal standard. For the structural confirmation of the products, see page S13.

Dess-Martin periodinane (276 mg, 651 μmol) was added to a solution of the above crude mixture and NaHCO<sub>3</sub> (546 mg, 6.50 mmol) in CH<sub>2</sub>Cl<sub>2</sub> (3.5 mL) at room temperature. The reaction mixture was stirred at room temperature for 1 h, and then saturated aqueous Na<sub>2</sub>S<sub>2</sub>O<sub>3</sub> (4 mL) was added. The resultant solution was extracted with EtOAc (5 mL x3), and the combined organic layers were dried over Na<sub>2</sub>SO<sub>4</sub>, filtered and concentrated. The residue was purified by flash column chromatography on silica gel (4 g, hexane/EtOAc 20/1) to afford the crude **17**, which was used in the next reaction without further purification.

TBSOTf (1.4 mL, 6.1 mmol) was added to a solution of the above crude ketone **17** and Et<sub>3</sub>N (1.7 mL, 12 mmol) in CH<sub>2</sub>Cl<sub>2</sub> (3 mL) at room temperature. The reaction mixture was heated to reflux and stirred for 1 h. After the mixture was cooled to room temperature, pH 7 phosphate buffer (1.5 mL) was added. The resultant solution was extracted with EtOAc (5 mL x3), and the combined organic layers were dried over Na<sub>2</sub>SO<sub>4</sub>, filtered and concentrated. The residue was purified by flash column chromatography on silica gel (4 g, hexane/EtOAc 50 /1) to afford the crude TBS-enol ether **18**, which was used in the next reaction without further purification.

*m*-CPBA (79.2 mg, 459 μmol) was added to a solution of the above TBS-enol ether **18** in CH<sub>2</sub>Cl<sub>2</sub> (3 mL) at room temperature. The reaction mixture was stirred for 2 h at room temperature, and then saturated aqueous NaHCO<sub>3</sub> (1.5 mL) and saturated aqueous Na<sub>2</sub>S<sub>2</sub>O<sub>3</sub> (1.5 mL) were successively added. The resultant solution was extracted with EtOAc (5 mL x3), and the combined organic layers were dried over Na<sub>2</sub>SO<sub>4</sub>, filtered and concentrated to afford the crude ketone **19**, which was used in the next reaction without further purification. The β/α C9-diastereomeric ratio of the major compound (*E*)-**19** was determined to be 4.0 : 1 by the <sup>1</sup>H NMR analysis of the crude mixture.

A solution of the above crude **19** mixture in THF (1 mL), H<sub>2</sub>O (1 mL) and AcOH (1 mL) was stirred for 24 h at room temperature, and then saturated aqueous NaHCO<sub>3</sub> (5 mL) was added. The resultant solution was extracted with EtOAc (10 mL x3), and the combined organic layers were dried over Na<sub>2</sub>SO<sub>4</sub>, filtered and concentrated. The residue was purified by flash column chromatography on silica gel (4 g, hexane/EtOAc 15/1) to afford the crude ketone **20**, which was used in the next reaction without further purification. The β/α C9-diastereomeric ratio of the major compound (*E*)-**20** was over 20 : 1 from the <sup>1</sup>H NMR analysis of the crude mixture.

NaBH<sub>4</sub> (31.6 mg, 836 μmol) was added to a solution of the above crude ketone **20** and CeCl<sub>3</sub>·7H<sub>2</sub>O (311 mg, 834 μmol) in MeOH (2.1 mL) at -78 °C. The reaction mixture was stirred for 5 min at -78 °C, and then saturated aqueous potassium sodium tartrate (3.0 mL) was added. The resultant solution was extracted with EtOAc (5 mL x3), and the combined

organic layers were dried over Na<sub>2</sub>SO<sub>4</sub>, filtered and concentrated to afford the crude diol **21**, which was used in the next reaction without further purification. The  $\beta/\alpha$  C8-diastereomeric ratio of the major compound (*E*)-**21** was determined to be 5.9 : 1 by the <sup>1</sup>H NMR analysis of the crude mixture. The  $\beta$ -orientation of the *cis*-C8, 9-diol was established by the NOESY spectra of the target compound **1**. For the key NOESY correlations, see page S18.

PPTS (26.2 mg, 104  $\mu$ mol) was added to a solution of the above crude diol **21** and 2,2-dimethoxypropane (510  $\mu$ L, 4.2 mmol) in toluene (2.1 mL) at room temperature. The reaction mixture was heated to 80 °C and stirred for 2 h. After the mixture was cooled to room temperature, saturated aqueous NaHCO<sub>3</sub> (3 mL) was added. The resultant solution was extracted with EtOAc (5 mL x3), and the combined organic layers were dried over Na<sub>2</sub>SO<sub>4</sub>, filtered and concentrated. The residue was purified by flash column chromatography on silica gel (2 g, hexane/EtOAc 30/1) to afford the crude acetone **22**, which was used in the next reaction without further purification.

Ozone was bubbled into a solution of the above crude acetone **22** in EtOAc (5 mL) for 1.5 min at -78 °C. Excess ozone was removed by bubbling O<sub>2</sub> at -78 °C for 5 min, and then Me<sub>2</sub>S (730  $\mu$ L, 9.8 mmol) was added. The reaction mixture was warmed to room temperature and stirred for 22 h. After toluene (5 mL) was added, the resultant mixture was concentrated at 20 °C. This procedure was repeated twice to remove excess Me<sub>2</sub>S. The residue was purified by flash column chromatography on silica gel (0.25 g, hexane/EtOAc 15/1) to afford enal **23** (20.5 mg, 44.1  $\mu$ mol) in 12% yield over 8 steps: **23** colorless oil;  $[\alpha]_D^{27}$  9.4 (*c* 1.0, CHCl<sub>3</sub>); IR (film)  $\nu$  2931, 2858, 1789, 1706, 1469, 1382, 1369, 1327, 1303, 1262, 1214, 1139, 1096, 1064, 1037, 1011, 937 cm<sup>-1</sup>; <sup>1</sup>H NMR (400 MHz, CDCl<sub>3</sub>)  $\delta$  0.13 (3H, s, CH<sub>3</sub> of TBS), 0.14 (3H, s, CH<sub>3</sub> of TBS), 0.92 (9H, s, *t*-Bu of TBS), 1.33 (3H, s, CH<sub>3</sub>), 1.37 (3H, s, CH<sub>3</sub>), 1.43 (3H, s, CH<sub>3</sub>), 1.66 (3H, s, CH<sub>3</sub>), 2.58 (1H, dd, *J* = 4.6, 2.7 Hz, H7), 2.65 (1H, d, *J* = 12.8 Hz, H6a), 3.07 (1H, dd, *J* = 12.8, 4.6 Hz, H6b), 4.34 (1H, d, *J* = 6.9 Hz, H9), 4.57 (1H, dd, *J* = 6.9, 2.7 Hz, H8), 4.61 (1H, s, H1), 4.67 (1H, d, *J* = 5.9 Hz, H2), 7.08 (1H, d, *J* = 5.9 Hz, H3), 9.47 (1H, s, H15); <sup>13</sup>C NMR (100 MHz, CDCl<sub>3</sub>)  $\delta$  -5.1, -4.5, 18.0, 24.5, 24.8, 24.9, 25.4, 28.2, 29.1, 46.1, 61.3, 71.9, 73.8, 75.2, 76.2, 82.5, 83.6, 110.5, 141.0, 149.3, 171.9, 191.1; HRMS (ESI) calcd for C<sub>24</sub>H<sub>36</sub>O<sub>7</sub>SiNa 487.2123 [M+Na]<sup>+</sup>, found 487.2125.

**Structural assignment of 2a and 30a:** Inseparable (*E*)-**2a**, (*Z*)-**2a** and **30a** were oxidized into (*E*)-**17**, (*Z*)-**17** and **S10**, respectively. Flash column chromatography of a small amount of the crude products gave pure (*E*)-**17** and (*Z*)-**17** along with the crude mixture of (*E*)-**17** and **S10**. An inseparable 1 : 1.3 mixture of (*E*)-**18** and **S11** was synthesized from the crude mixture of (*E*)-**17** and **S10** by treatment with TBSOTf and Et<sub>3</sub>N in refluxing CH<sub>2</sub>Cl<sub>2</sub>. The 6-membered ring structures of (*E*)-**17** and (*Z*)-**17** were elucidated by the 1D and 2D NMR experiments, and the stereochemistries of the vinyl silane of (*Z*)-**17** was determined by the

NOE correlation between H3 and H15. The 7-membered ring formation was also established by the 1D and 2D NMR experiments of the mixture of (*E*)-**18** and **S11**.

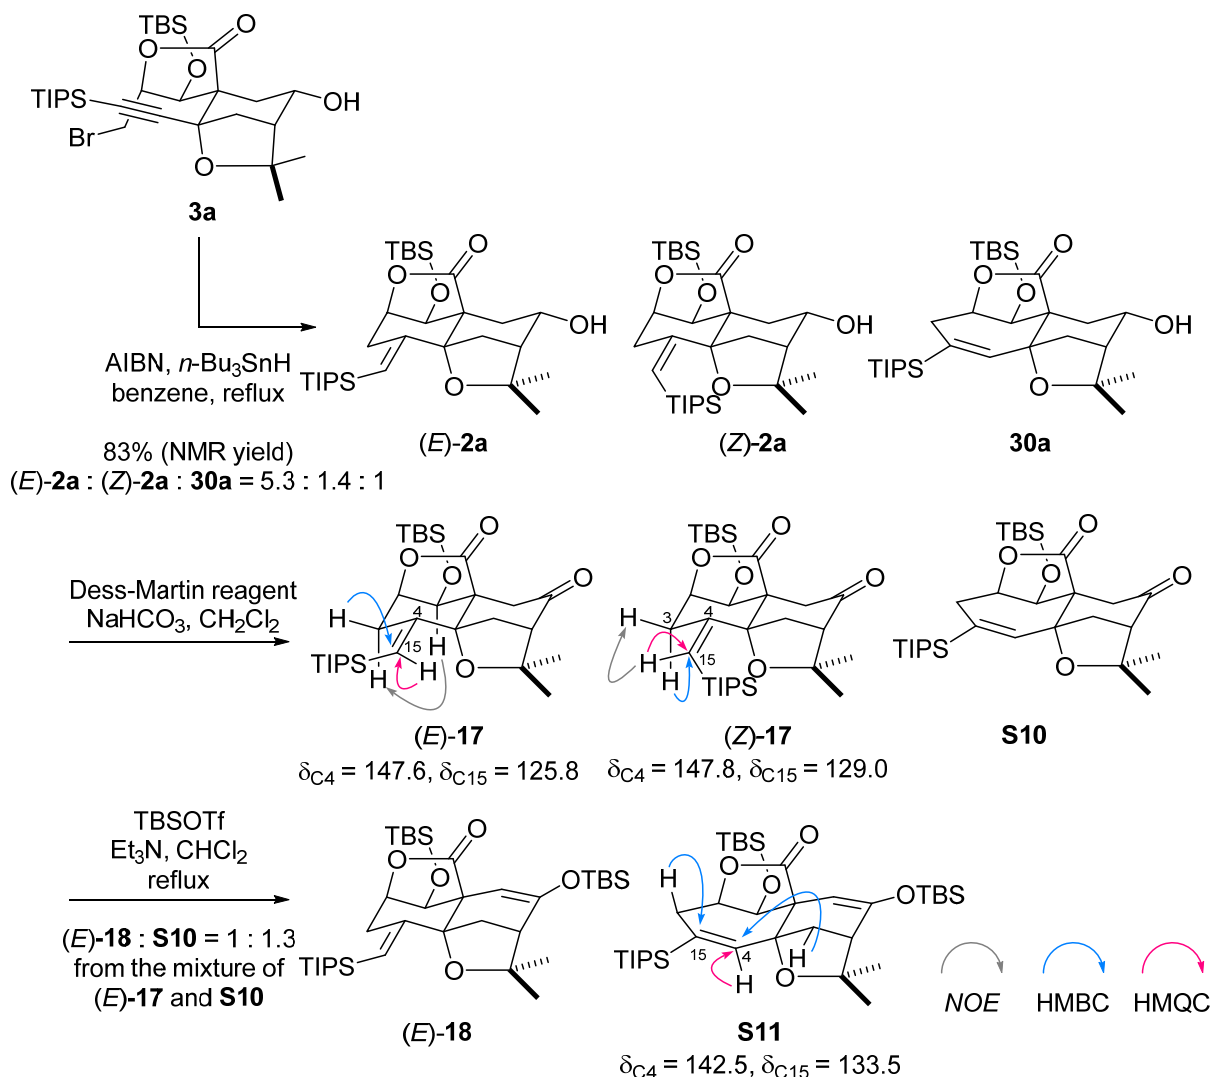

(*E*)-**17**: colorless oil;  $[\alpha]_D^{25}$  53 (*c* 0.15, CHCl<sub>3</sub>); IR (film)  $\nu$  2933, 2894, 2864, 1779, 1721, 1622, 1465, 1386, 1364, 1257, 1212, 1187, 1137, 1120, 1089, 1058, 1032, 997, 973 cm<sup>-1</sup>; <sup>1</sup>H NMR (400 MHz, CDCl<sub>3</sub>)  $\delta$  0.09 (3H, s, CH<sub>3</sub> of TBS), 0.10 (3H, s, CH<sub>3</sub> of TBS), 0.87 (9H, s, *t*-Bu of TBS), 1.05 (9H, d, *J* = 6.8 Hz, CH<sub>3</sub> of TIPS x3), 1.06 (9H, d, *J* = 6.8 Hz, CH<sub>3</sub> of TIPS x3), 1.13 (3H, m, CH of TIPS x3), 1.22 (3H, s, CH<sub>3</sub>), 1.23 (3H, s, CH<sub>3</sub>), 2.28 (1H, br d, *J* = 15.1 Hz, H6a), 2.55 (1H, d, *J* = 20.6 Hz, H9a), 2.73-2.80 (3H, m, H3a, H6b and H7), 2.85 (1H, d, *J* = 20.6 Hz, H9b), 2.99 (1H, dd, *J* = 15.1, 5.3 Hz, H3b), 4.56 (1H, d, *J* = 5.3 Hz, H2), 4.64 (1H, s, H1), 5.77 (1H, d, *J* = 1.8 Hz, H15); <sup>13</sup>C NMR (100 MHz, CDCl<sub>3</sub>)  $\delta$  -4.9, -4.6, 12.2, 17.9, 18.7, 18.8, 25.6, 25.7, 29.1, 31.2, 35.9, 36.2, 57.9, 58.9, 80.8, 82.4, 86.1, 125.8, 147.6, 176.6, 208.6; HRMS (ESI) calcd for C<sub>30</sub>H<sub>52</sub>O<sub>5</sub>Si<sub>2</sub>Na 571.3245 [M+Na]<sup>+</sup>, found 571.3236.

(*Z*)-**17**: colorless oil;  $[\alpha]_D^{25}$  29 (*c* 0.28, CHCl<sub>3</sub>); IR (film)  $\nu$  2949, 2929, 2863, 1772, 1722, 1608, 1465, 1389, 1367, 1257, 1202, 1180, 1122, 1085, 1059, 1024, 1002, 971 cm<sup>-1</sup>; <sup>1</sup>H NMR (400 MHz, CDCl<sub>3</sub>)  $\delta$  0.09 (3H, s, CH<sub>3</sub> of TBS), 0.11 (3H, s, CH<sub>3</sub> of TBS), 0.88 (9H, s, *t*-Bu of



4.34 (1H, d,  $J = 6.9$  Hz, H9), 4.48 (1H, d,  $J = 6.0$  Hz, H2), 4.53 (1H, s, H1), 4.56 (1H, dd,  $J = 6.9, 2.8$  Hz, H8), 6.35 (1H, ddd,  $J = 6.0, 1.4, 1.4$  Hz, H3);  $^{13}\text{C}$  NMR (125 MHz,  $\text{CDCl}_3$ )  $\delta$  -5.1, -4.4, 18.0, 24.3, 24.8, 24.9, 25.4, 29.2, 29.3, 45.8, 60.51, 60.54, 61.5, 72.1, 73.9, 76.2, 82.3, 84.3, 110.4, 127.4, 142.4, 173.0; HRMS (ESI) calcd for  $\text{C}_{24}\text{H}_{38}\text{O}_7\text{SiNa}$  489.2279  $[\text{M}+\text{Na}]^+$ , found 489.2281.

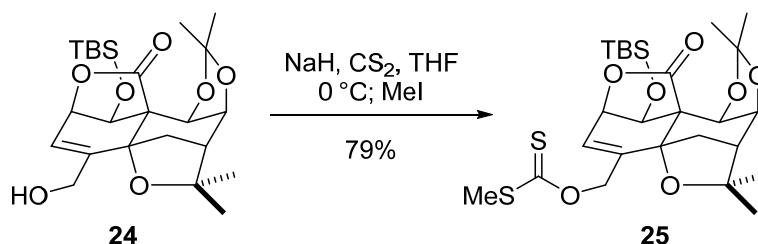

**Xanthate 25.**  $\text{CS}_2$  (25  $\mu\text{L}$ , 410  $\mu\text{mol}$ ) was added to a solution of alcohol **24** (18.9 mg, 40.5  $\mu\text{mol}$ ) and NaH (70% purity, 13.9 mg, 405  $\mu\text{mol}$ ) in THF (405  $\mu\text{L}$ ) at  $0\text{ }^\circ\text{C}$ . The reaction mixture was stirred at  $0\text{ }^\circ\text{C}$  for 13 min, and then MeI (25  $\mu\text{L}$ , 410  $\mu\text{mol}$ ) was added. The reaction mixture was stirred at  $0\text{ }^\circ\text{C}$  for 1 h, and then saturated aqueous  $\text{NH}_4\text{Cl}$  (1.5 mL) was added. The resultant solution was extracted with EtOAc (5 mL x3), and the combined organic layers were dried over  $\text{Na}_2\text{SO}_4$ , filtered and concentrated. The residue was purified by flash column chromatography on silica gel (0.5 g, hexane/EtOAc 15/1) to afford xanthate **25** (17.8 mg, 32.0  $\mu\text{mol}$ ) in 79% yield: colorless oil; IR (film)  $\nu$  2924, 2852, 1771, 1460, 1382, 1258, 1213, 1064, 1004  $\text{cm}^{-1}$ ;  $^1\text{H}$  NMR (400 MHz,  $\text{CDCl}_3$ )  $\delta$  0.12 (3H, s,  $\text{CH}_3$  of TBS), 0.13 (3H, s,  $\text{CH}_3$  of TBS), 0.91 (9H, s,  $t\text{-Bu}$  of TBS), 1.32 (3H, s,  $\text{CH}_3$ ), 1.32 (3H, s,  $\text{CH}_3$ ), 1.38 (3H, s,  $\text{CH}_3$ ), 1.67 (3H, s,  $\text{CH}_3$ ), 2.12 (1H, dd,  $J = 13.3, 4.6$  Hz, H6a), 2.52-2.56 (1H, m, H7), 2.56 (3H, s,  $\text{SCH}_3$ ), 2.76 (1H, d,  $J = 13.3$  Hz, H6b), 4.34 (1H, d,  $J = 6.9$  Hz, H9), 4.49 (1H, d,  $J = 6.4$  Hz, H2), 4.53 (1H, s, H1), 4.56 (1H, dd,  $J = 6.9, 2.7$  Hz, H8), 4.98 (1H, d,  $J = 13.8$  Hz, H15a), 5.16 (1H, d,  $J = 13.8$  Hz, H15b), 6.41 (1H, d,  $J = 6.4$  Hz, H3); HRMS (ESI) calcd for  $\text{C}_{26}\text{H}_{40}\text{O}_7\text{S}_2\text{SiNa}$  579.1877  $[\text{M}+\text{Na}]^+$ , found 579.1870.

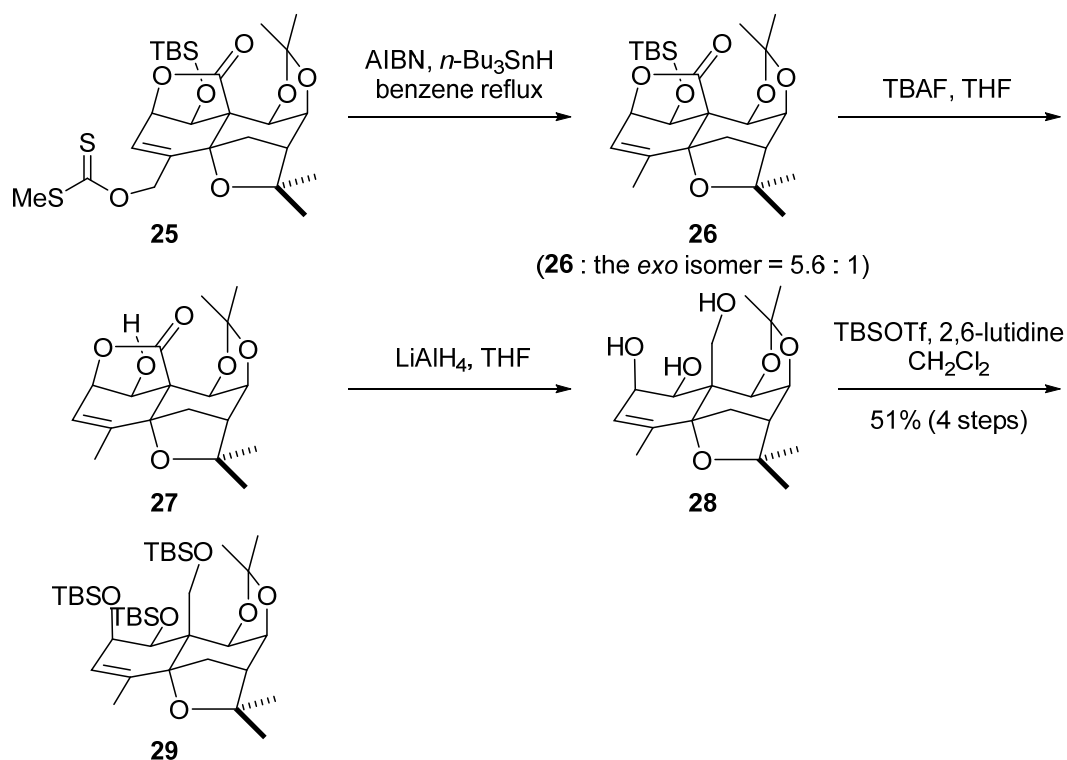

**Tris-TBS ether 29.** A solution of xanthate **25** (17.8 mg, 32.0  $\mu\text{mol}$ ),  $n\text{-Bu}_3\text{SnH}$  (86  $\mu\text{L}$ , 320  $\mu\text{mol}$ ) and AIBN (5.3 mg, 32  $\mu\text{mol}$ ) in benzene (320  $\mu\text{L}$ ) was degassed by freeze-thaw procedure (x3). The reaction mixture was heated to reflux, stirred for 2 h and then concentrated. The residue was purified by flash column chromatography [a column consecutively packed with silica gel (1 g) and 50% (w/w) KF contained silica gel (1 g), hexane/EtOAc 10/1] to afford an inseparable 5.6 : 1 mixture of the *endo*-olefin **26** and the *exo*-olefin isomer, which was used in the next reaction without further purification.

TBAF (1.0 M in THF, 46  $\mu\text{L}$ , 46  $\mu\text{mol}$ ) was added to a solution of the above crude mixture in THF (0.3 mL) at  $-20\text{ }^\circ\text{C}$ . The reaction mixture was warmed to room temperature and stirred for 2 h, and then saturated aqueous  $\text{NH}_4\text{Cl}$  (3 mL) was added. The resultant solution was extracted with EtOAc (5 mL x3), and the combined organic layers were dried over  $\text{Na}_2\text{SO}_4$ , filtered and concentrated. The residue was purified by flash column chromatography on silica gel (0.5 g, hexane/EtOAc 2/1) to afford the crude alcohol **27**, which was used in the next reaction without further purification.

$\text{LiAlH}_4$  (16.4 mg, 432  $\mu\text{mol}$ ) was added to a solution of the above crude alcohol **27** in THF (0.3 mL) at room temperature. The reaction mixture was stirred at room temperature for 30 min. After the mixture was cooled to  $0\text{ }^\circ\text{C}$ ,  $\text{H}_2\text{O}$  (5 drops) was added. The resultant solution was filtrated through a pad of Celite with EtOAc (30 mL). The filtrate was concentrated to afford the crude triol **28**, which was used in the next reaction without further purification.

TBSOTf (200  $\mu\text{L}$ , 870  $\mu\text{mol}$ ) was added to a solution of the above crude triol **28** and 2,6-lutidine (200  $\mu\text{L}$ , 1.7 mmol) in  $\text{CH}_2\text{Cl}_2$  (290  $\mu\text{L}$ ) at room temperature. The reaction

mixture was stirred at room temperature for 30 min, and then pH 7 phosphate buffer (1.5 mL) was added. The resultant solution was extracted with EtOAc (5 mL x3), and the combined organic layers were dried over Na<sub>2</sub>SO<sub>4</sub>, filtered and concentrated. The residue was purified by flash column chromatography on silica gel (0.5 g, hexane/EtOAc 180/1 to 50/1) to afford tris-TBS ether **29** (11.1 mg, 16.2  $\mu$ mol) in 51% yield over 4 steps: colorless oil;  $[\alpha]_D^{27}$  -2.8 (*c* 0.18, CHCl<sub>3</sub>); IR (film)  $\nu$  2953, 2931, 2897, 2857, 1469, 1365, 1300, 1254, 1210, 1165, 1123, 1098, 1060, 1043, 923 cm<sup>-1</sup>; <sup>1</sup>H NMR (400 MHz, CDCl<sub>3</sub>)  $\delta$  -0.01 (3H, s, CH<sub>3</sub> of TBS), 0.00 (3H, s, CH<sub>3</sub> of TBS), 0.03 (3H, s, CH<sub>3</sub> of TBS), 0.06 (3H, s, CH<sub>3</sub> of TBS), 0.09 (3H, s, CH<sub>3</sub> of TBS), 0.11 (3H, s, CH<sub>3</sub> of TBS), 0.89 (9H, s, *t*-Bu of TBS), 0.91 (9H, s, *t*-Bu of TBS), 0.93 (9H, s, *t*-Bu of TBS), 1.25 (3H, s, CH<sub>3</sub>), 1.30 (3H, s, CH<sub>3</sub>), 1.32 (3H, s, CH<sub>3</sub>), 1.55 (3H, s, CH<sub>3</sub>), 1.78 (3H, s, H15), 1.98 (1H, dd, *J* = 12.4, 4.6 Hz, H6a), 2.36 (1H, dd, *J* = 3.7, 2.3 Hz, H7), 3.41 (1H, d, *J* = 12.4 Hz, H6b), 4.01 (1H, d, *J* = 11.4 Hz, H14a), 4.18 (1H, d, *J* = 11.4 Hz, H14b), 4.18 (1H, d, *J* = 6.4 Hz, H9), 4.21-4.25 (1H, m, H2), 4.22 (1H, s, H1), 4.48 (1H, dd, *J* = 6.4, 2.3 Hz, H8), 5.62 (1H, m, H3); <sup>13</sup>C NMR (125 MHz, CDCl<sub>3</sub>)  $\delta$  -5.4, -5.0, -4.9, -4.7, -2.5, -2.2, 18.1, 18.2, 18.4, 19.1, 24.3, 24.5, 26.16, 26.25, 26.32, 26.6, 28.4, 29.7, 46.8, 51.1, 61.1, 68.2, 73.7, 74.7, 76.1, 78.8, 87.2, 108.2, 128.2, 135.0; HRMS (ESI) calcd for C<sub>36</sub>H<sub>70</sub>O<sub>6</sub>Si<sub>3</sub>Na 705.4372 [M+Na]<sup>+</sup>, found 705.4387.

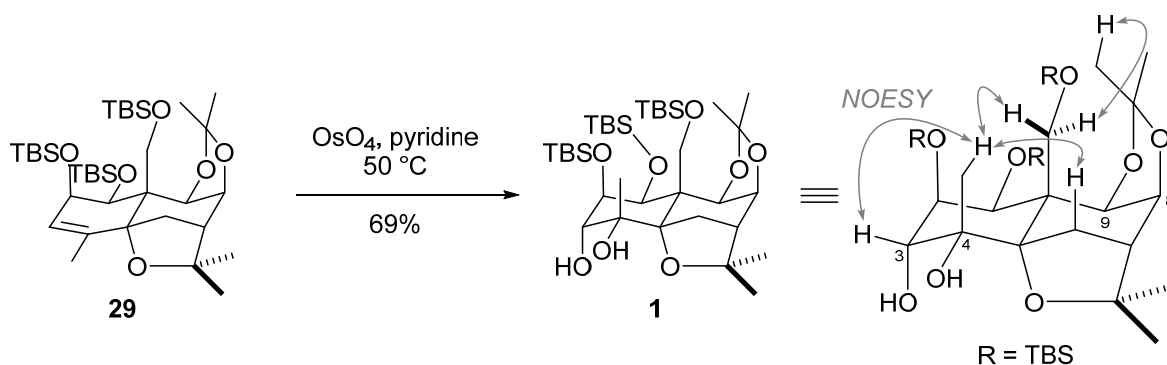

**Compound 1.** OsO<sub>4</sub> (0.5 M in pyridine, 64  $\mu$ L, 32  $\mu$ mol) was added to a solution of tris-TBS ether **29** (2.2 mg, 3.2  $\mu$ mol) in pyridine (0.26 mL) at room temperature. The reaction mixture was warmed to 50 °C and stirred for 40 h. After the mixture was cooled to room temperature, EtOAc (0.25 mL) and saturated aqueous NaHSO<sub>3</sub> (1 mL) were successively added. The mixture was stirred for 18 h, and the resultant solution was extracted with EtOAc (5 mL x3). The combined organic layers were dried over Na<sub>2</sub>SO<sub>4</sub>, filtered and concentrated. The residue was purified by flash column chromatography on silica gel (0.5 g, hexane/EtOAc 50/1 to 15/1) to afford **1** (1.6 mg, 2.2  $\mu$ mol) in 69% yield. The stereochemistry of the  $\alpha$ -oriented *cis*-C3, 4-diol and  $\beta$ -oriented *cis*-C8, 9-diol were elucidated by the NOESY experiment of **1**: colorless oil;  $[\alpha]_D^{26}$  3.7 (*c* 0.21, CHCl<sub>3</sub>); IR (film)  $\nu$  3442, 2929, 2857, 1469, 1378, 1256, 1213, 1108, 1039 cm<sup>-1</sup>; <sup>1</sup>H NMR (400 MHz, CDCl<sub>3</sub>)  $\delta$  0.02 (3H, s, CH<sub>3</sub> of TBS), 0.04 (3H, s, CH<sub>3</sub> of TBS), 0.08 (3H, s, CH<sub>3</sub> of TBS), 0.12 (3H, s,

$\text{CH}_3$  of TBS), 0.15 (6H, s,  $\text{CH}_3$  of TBS x2), 0.93 (27H, s,  $t\text{-Bu}$  of TBS x 3), 0.131 (3H, s,  $\text{CH}_3$ ), 0.135 (3H, s,  $\text{CH}_3$ ), 1.36 (3H, s,  $\text{CH}_3$ ), 1.43 (3H, s,  $\text{CH}_3$ ), 1.53 (3H, s,  $\text{CH}_3$ ), 2.14 (1H, dd,  $J = 12.4, 3.2$  Hz, H6a), 2.29 (1H, m, H7), 3.04 (1H, s, OH), 3.38 (1H, d,  $J = 12.4$  Hz, H6b), 3.54 (1H, dd,  $J = 11.4, 2.8$  Hz, H3), 3.94 (1H, d,  $J = 7.3$  Hz, H9), 4.01 (1H, d,  $J = 4.1$  Hz, H1), 4.08 (1H, dd,  $J = 4.1, 2.8$  Hz, H2), 4.10 (1H, d,  $J = 12.4$  Hz, H14a), 4.24 (1H, d,  $J = 11.4$  Hz, OH), 4.46 (1H, br d,  $J = 7.3$ , H8), 4.60 (1H, d,  $J = 12.4$  Hz, H14b);  $^{13}\text{C}$  NMR (125 MHz,  $\text{CDCl}_3$ )  $\delta$  -5.2, -4.6, -4.3, -4.2, -4.0, -2.5, 18.07, 18.14, 18.5, 23.1, 24.2, 24.6, 26.3, 26.5, 26.6, 26.8, 29.0, 29.7, 44.8, 52.4, 59.0, 69.6, 74.5, 74.7, 77.9, 79.1, 80.2, 81.5, 96.2, 108.4; HRMS (ESI) calcd for  $\text{C}_{36}\text{H}_{72}\text{O}_8\text{Si}_3\text{Na}$  739.4427  $[\text{M}+\text{Na}]^+$ , found 739.4449.

## References

- S1 Ohtani, I.; Kusumi, T.; Kashman, Y.; Kakisawa, H. *J. Am. Chem. Soc.* **1991**, *113*, 4092.  
S2 (a) Imamoto, T.; Takiyama, N.; Nakamura, K.; Hatajima, T.; Kamiya, Y. *J. Am. Chem. Soc.* **1989**, *111*, 4392. (b) Takeda, N.; Imamoto, T. *Org. Synth.* **1999**, *76*, 228.

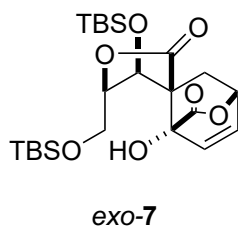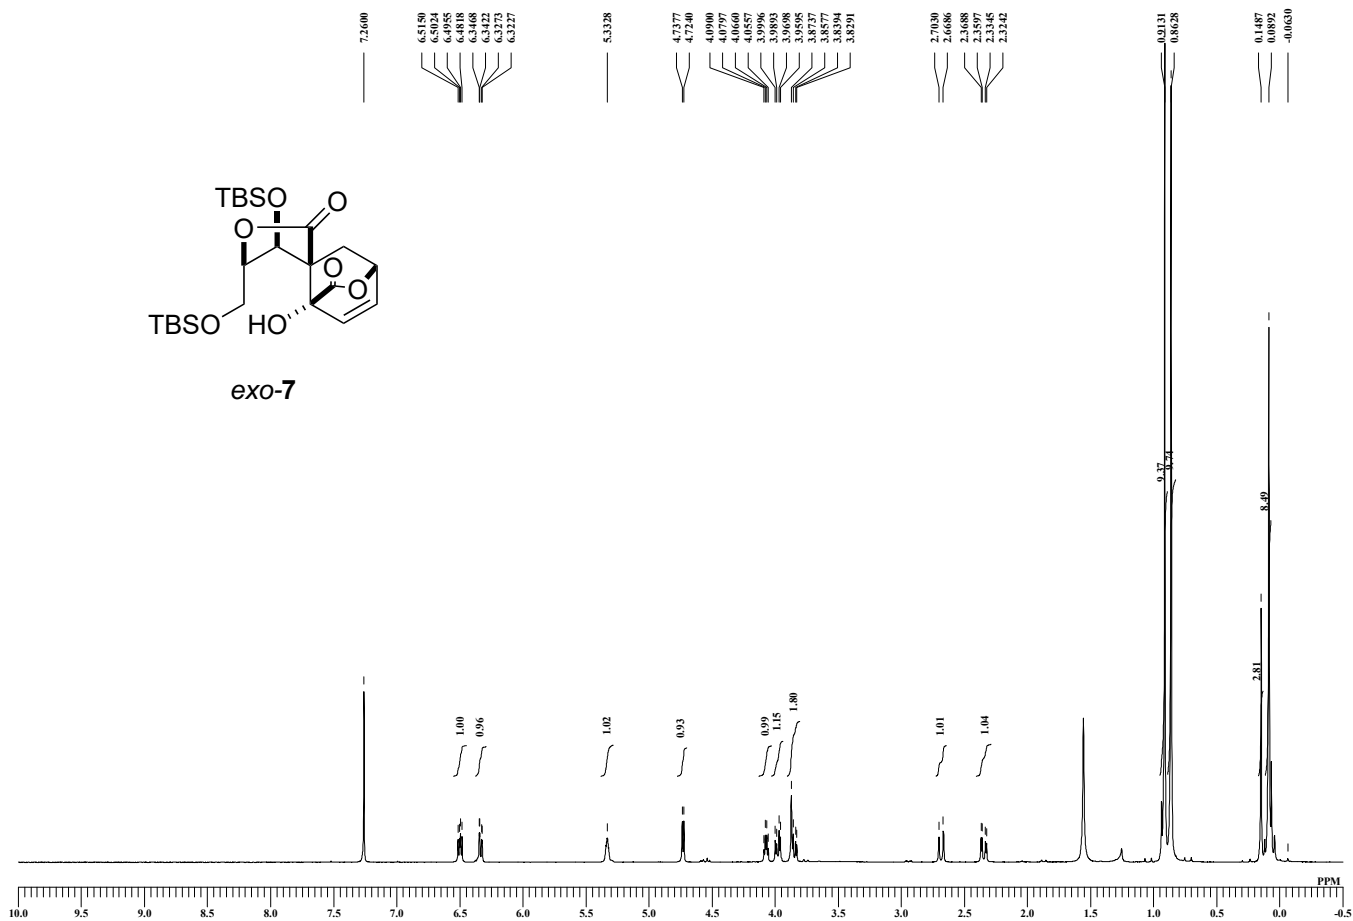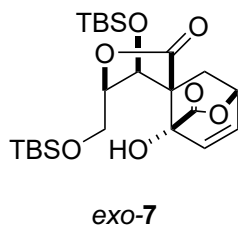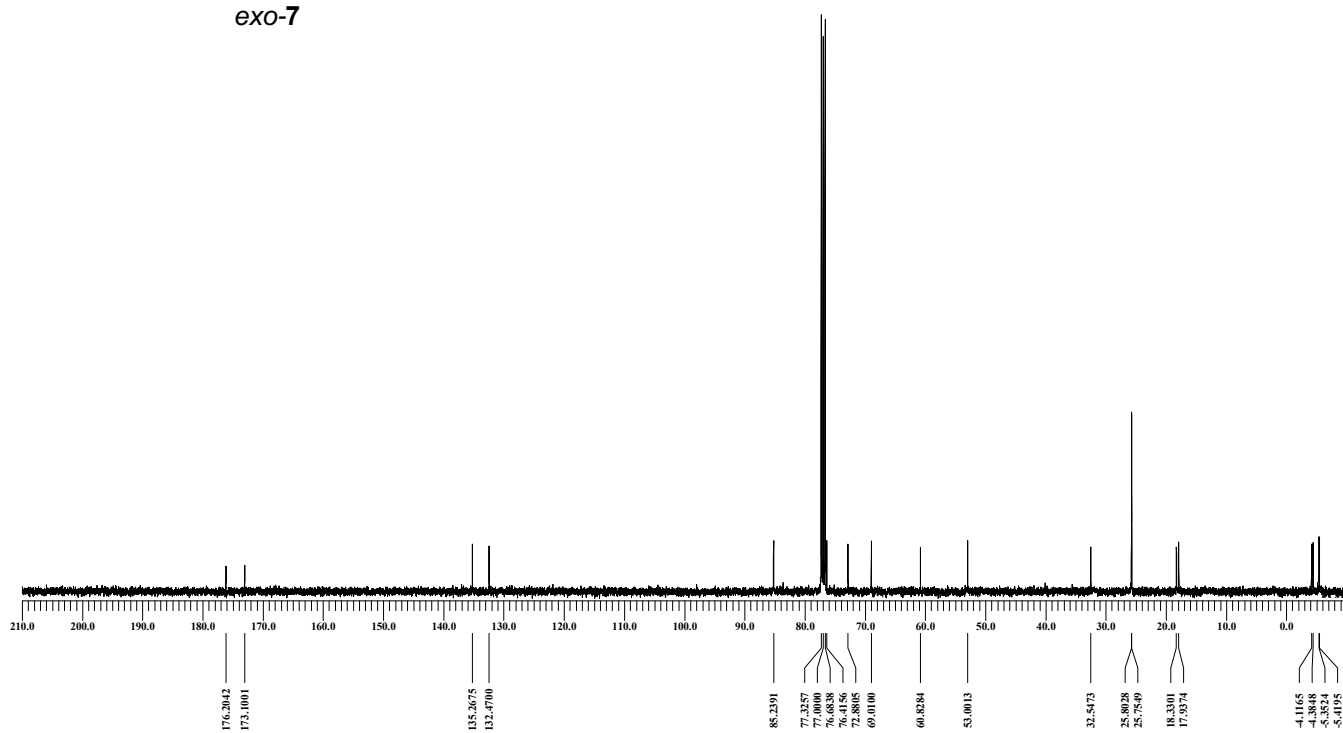

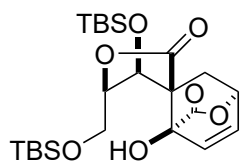

*endo-7*

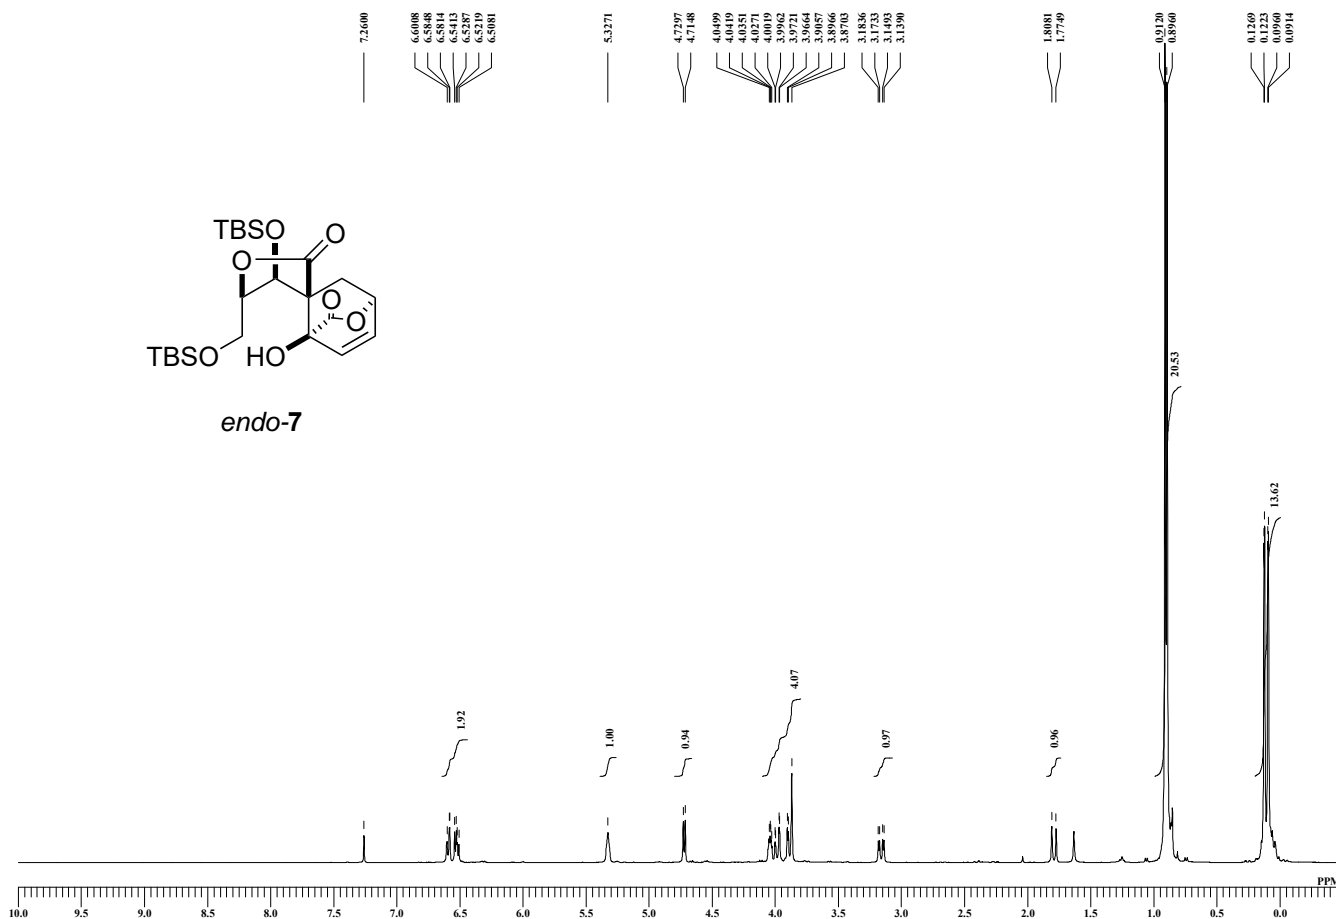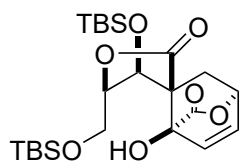

*endo-7*

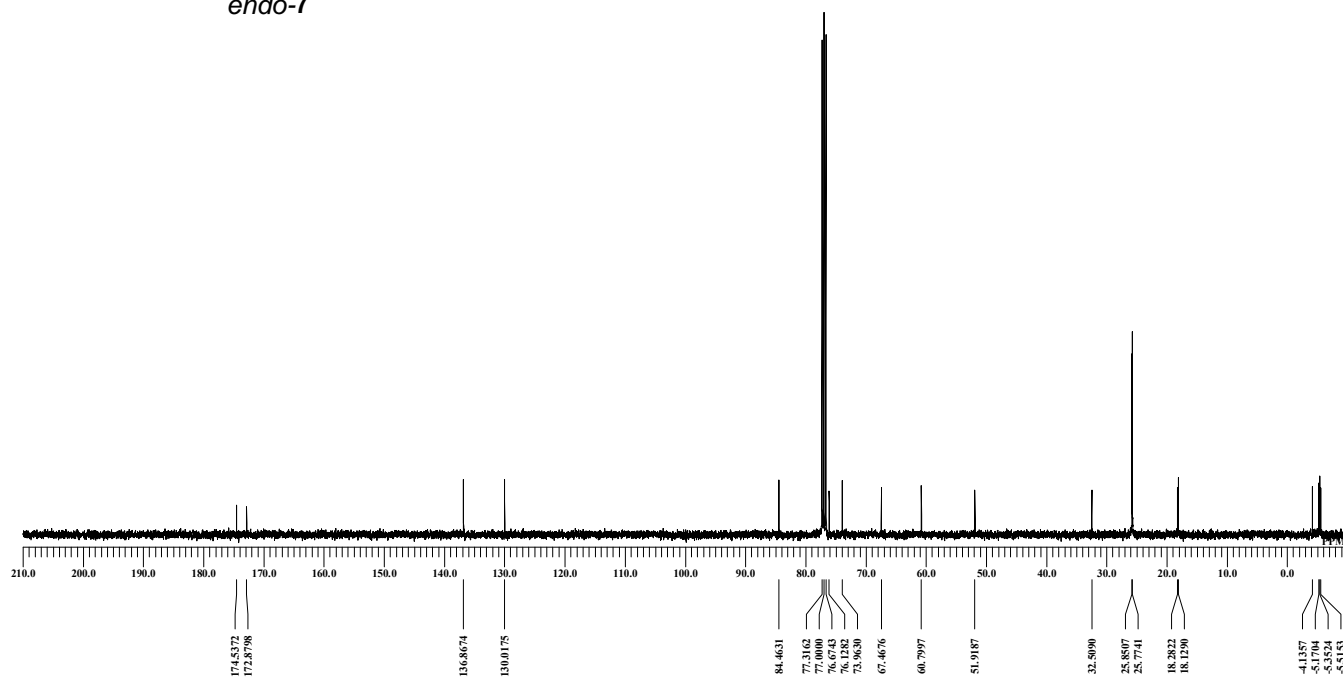

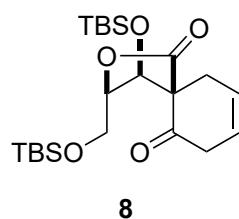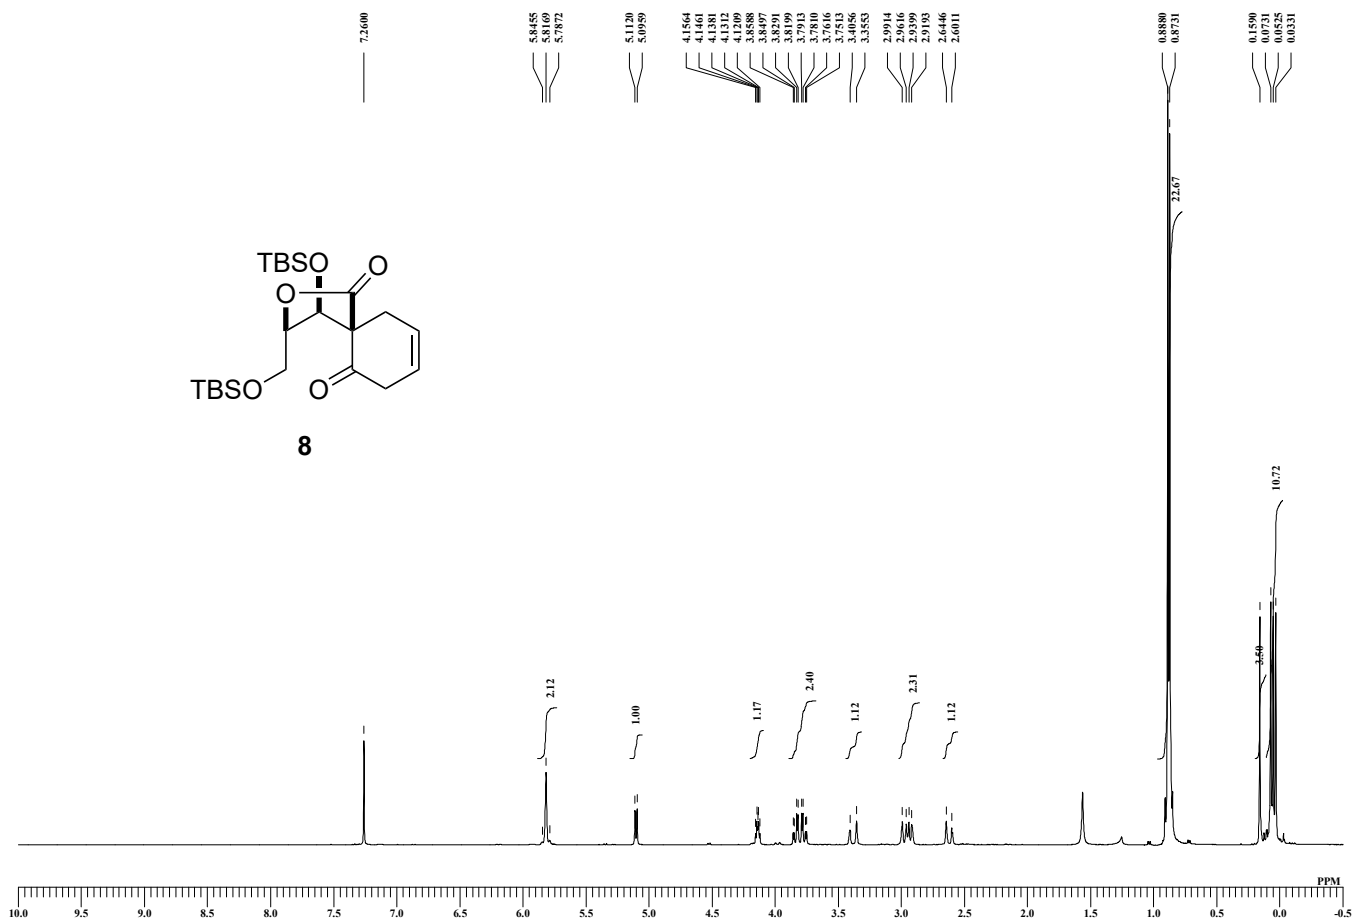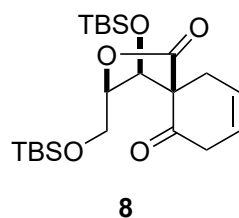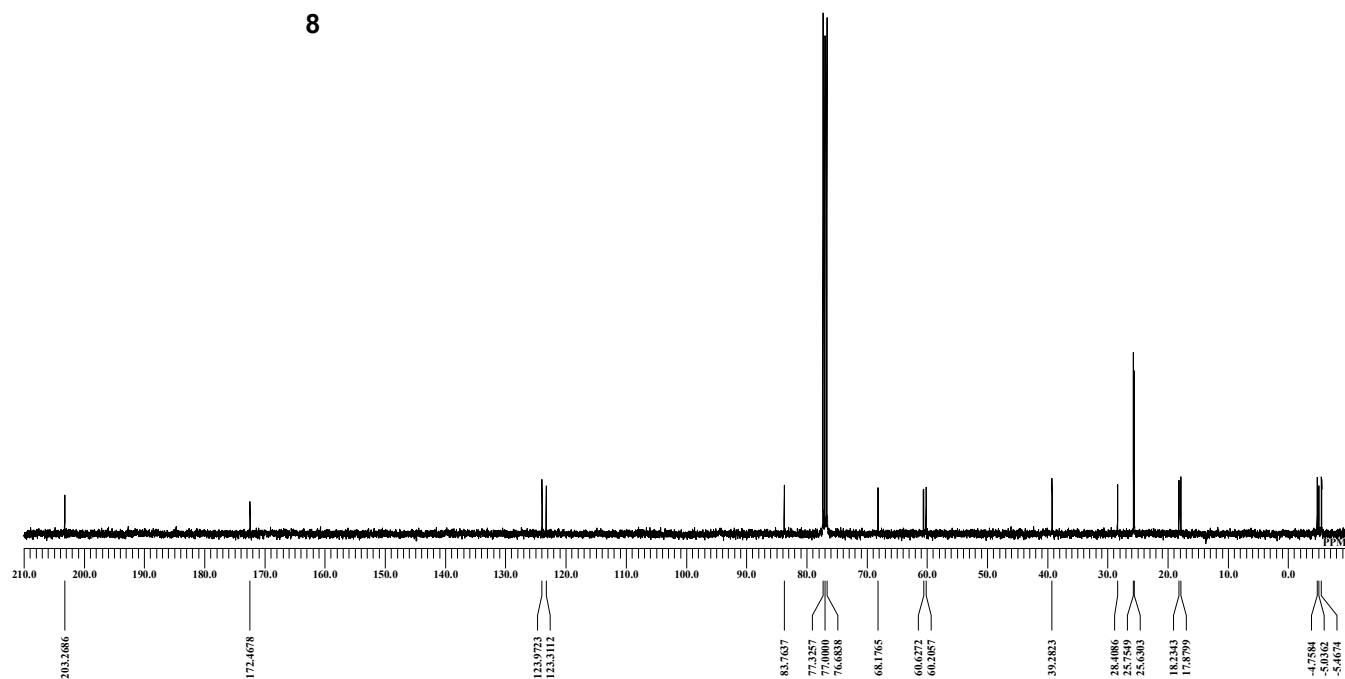

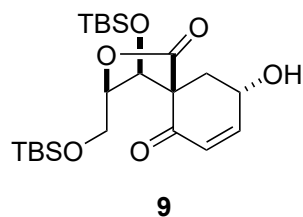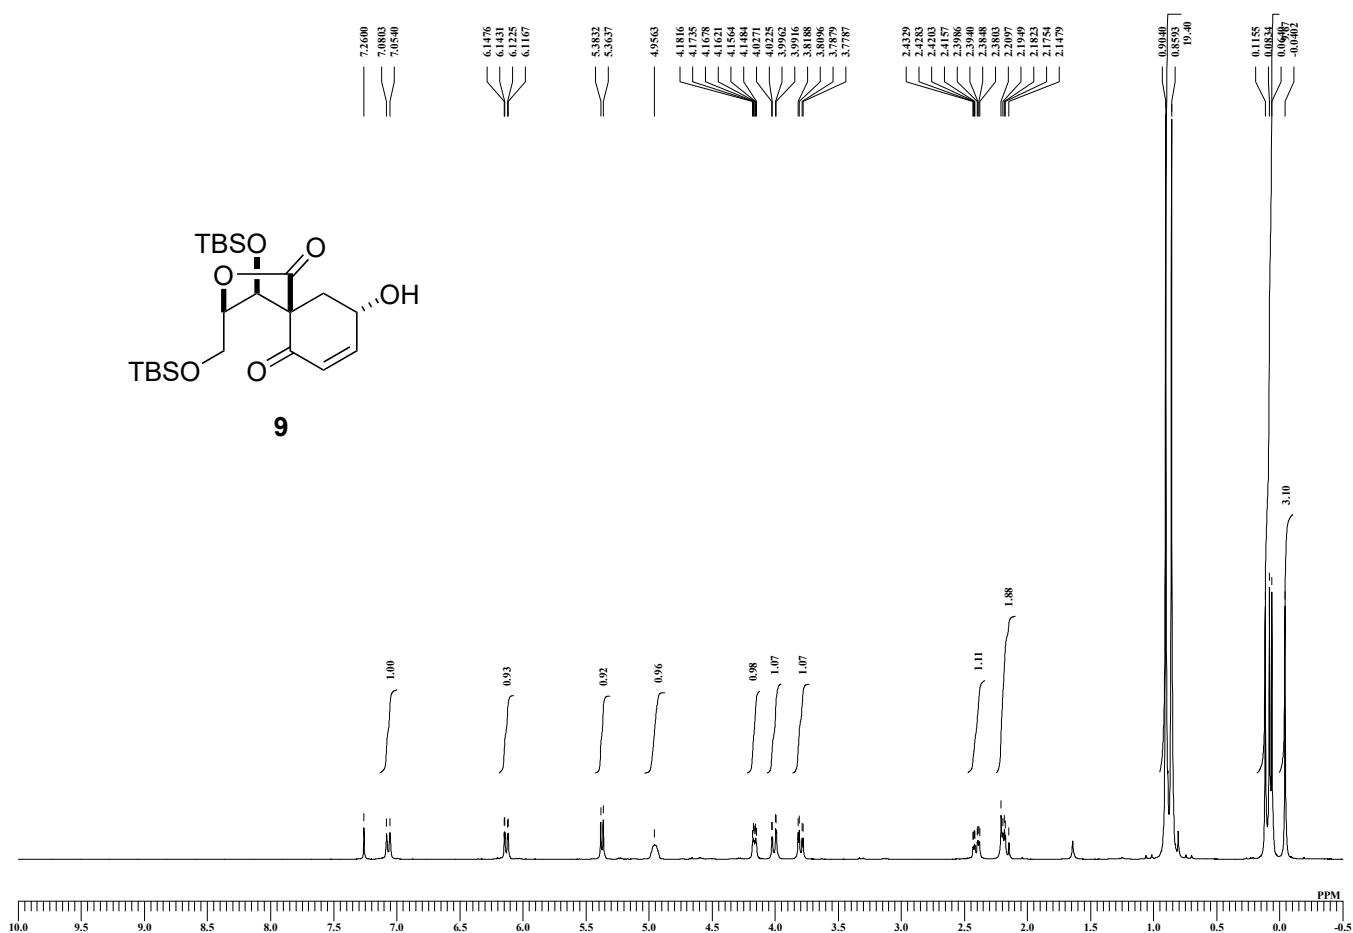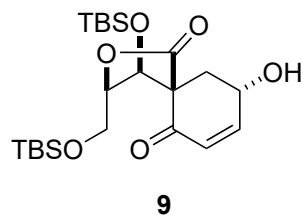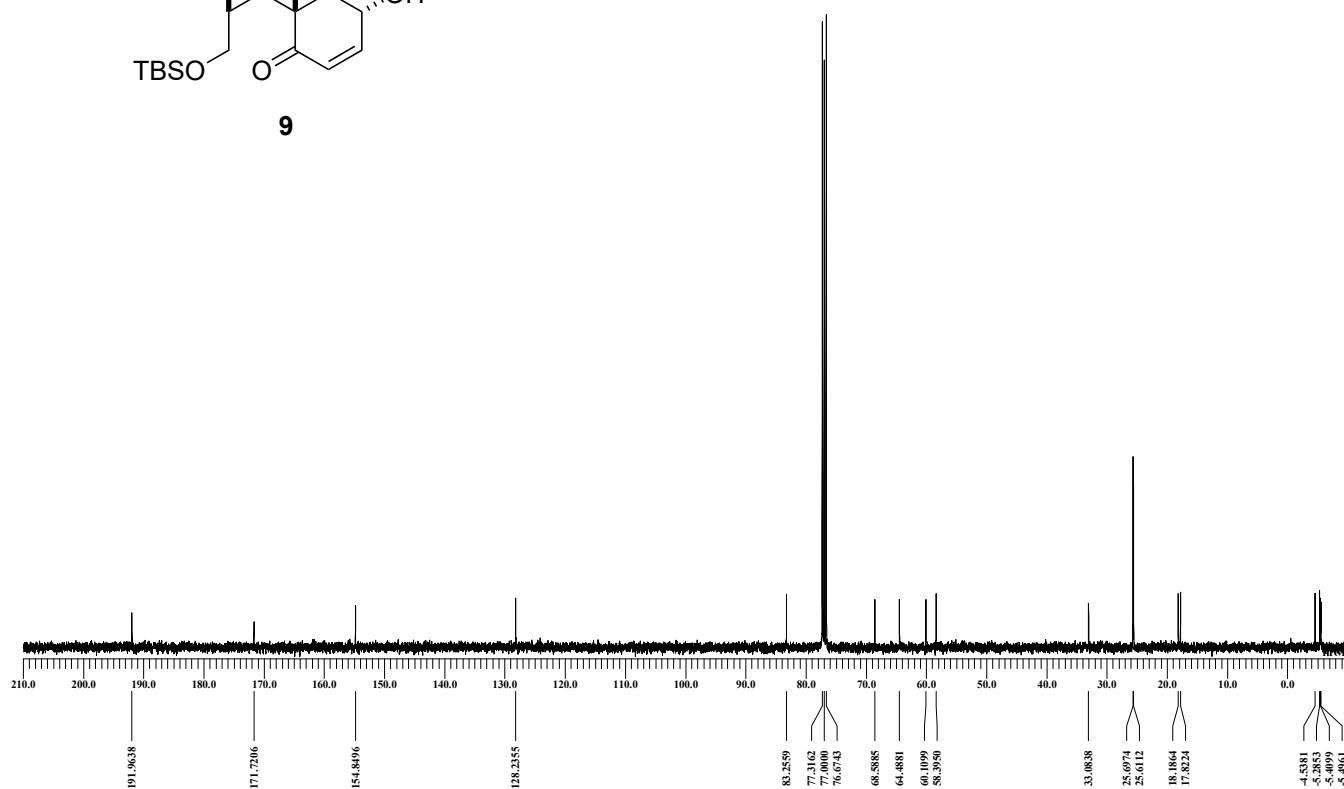

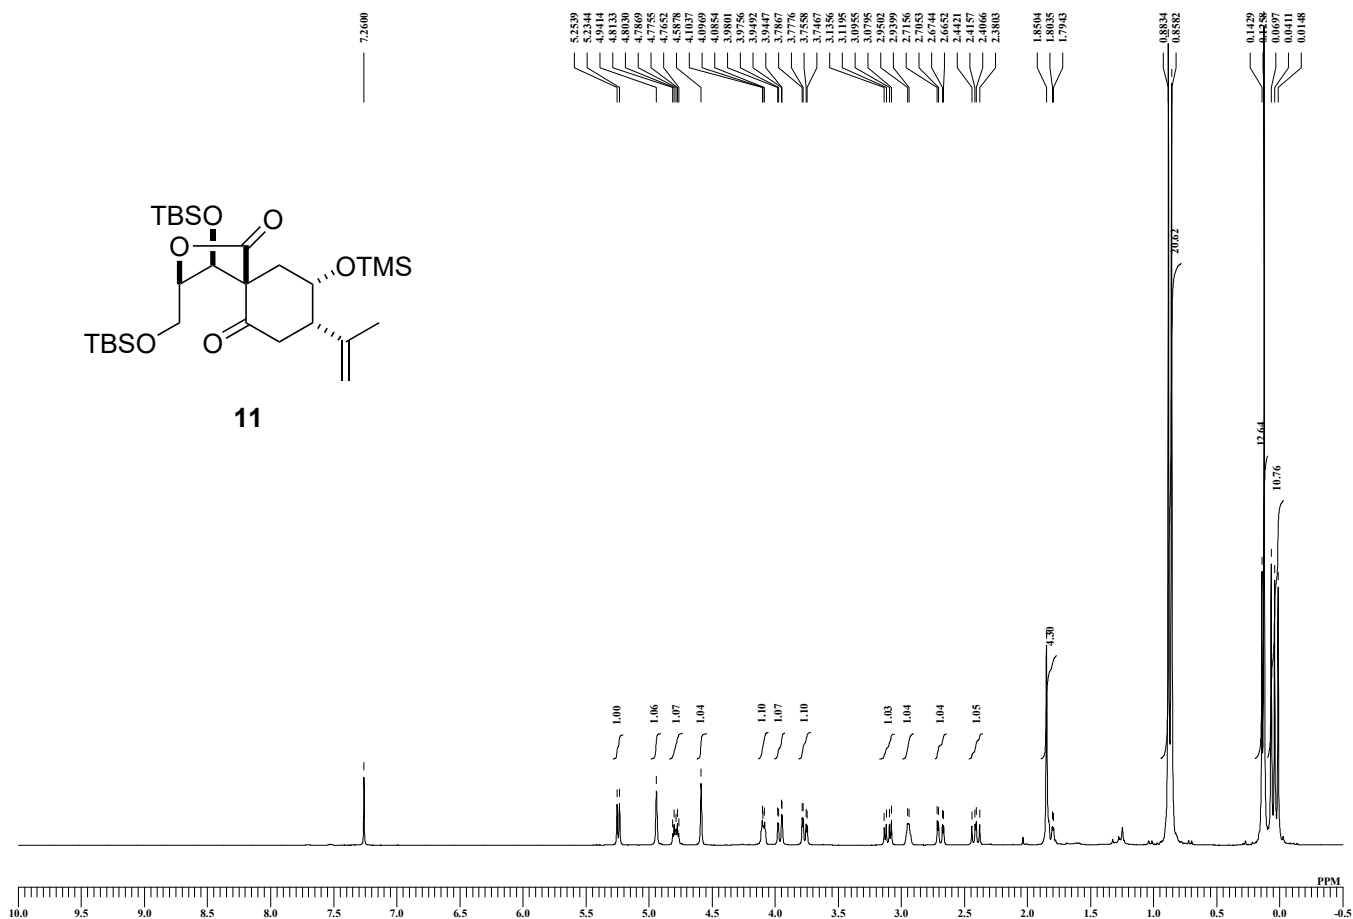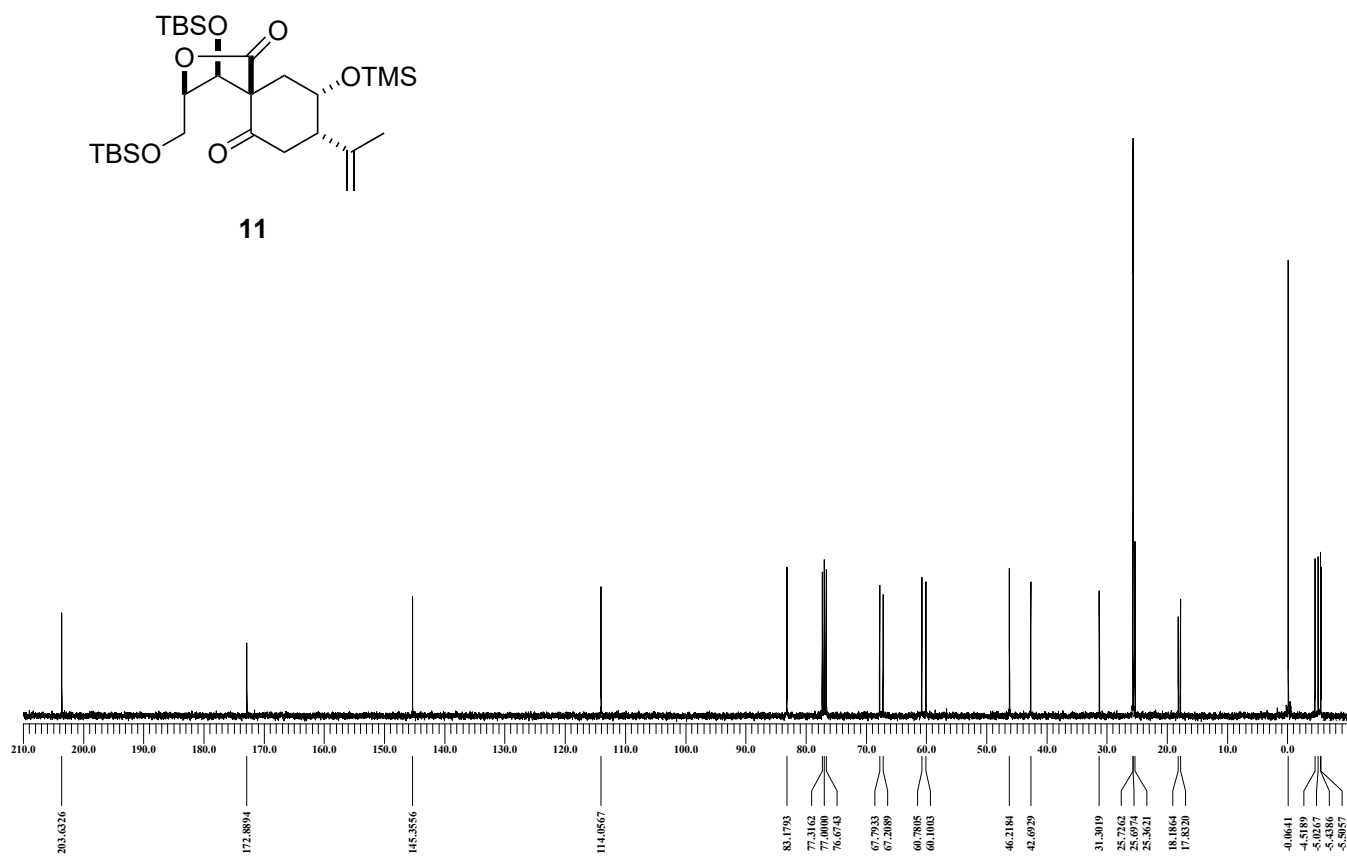

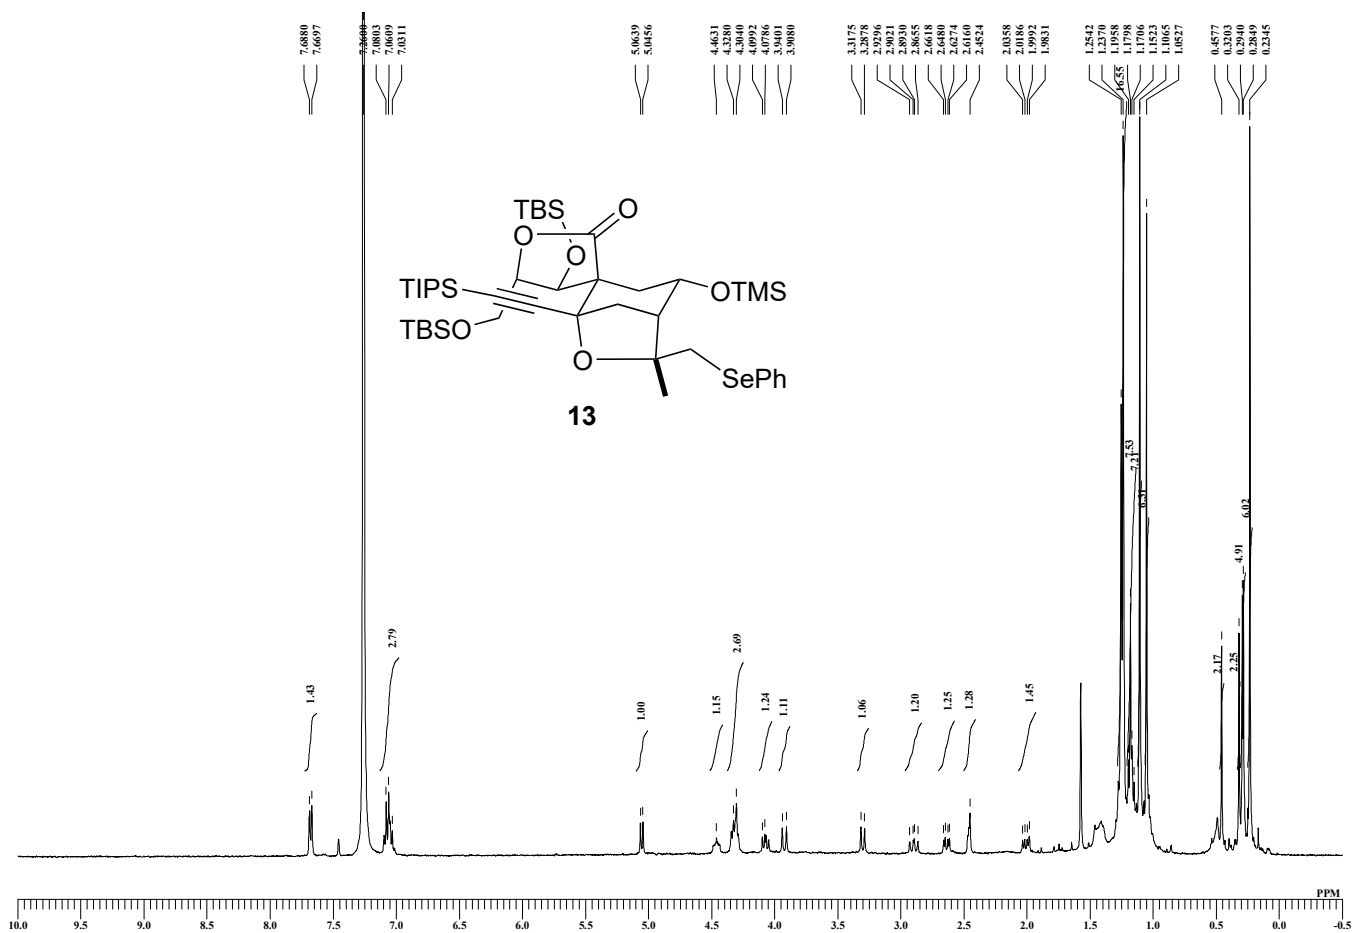

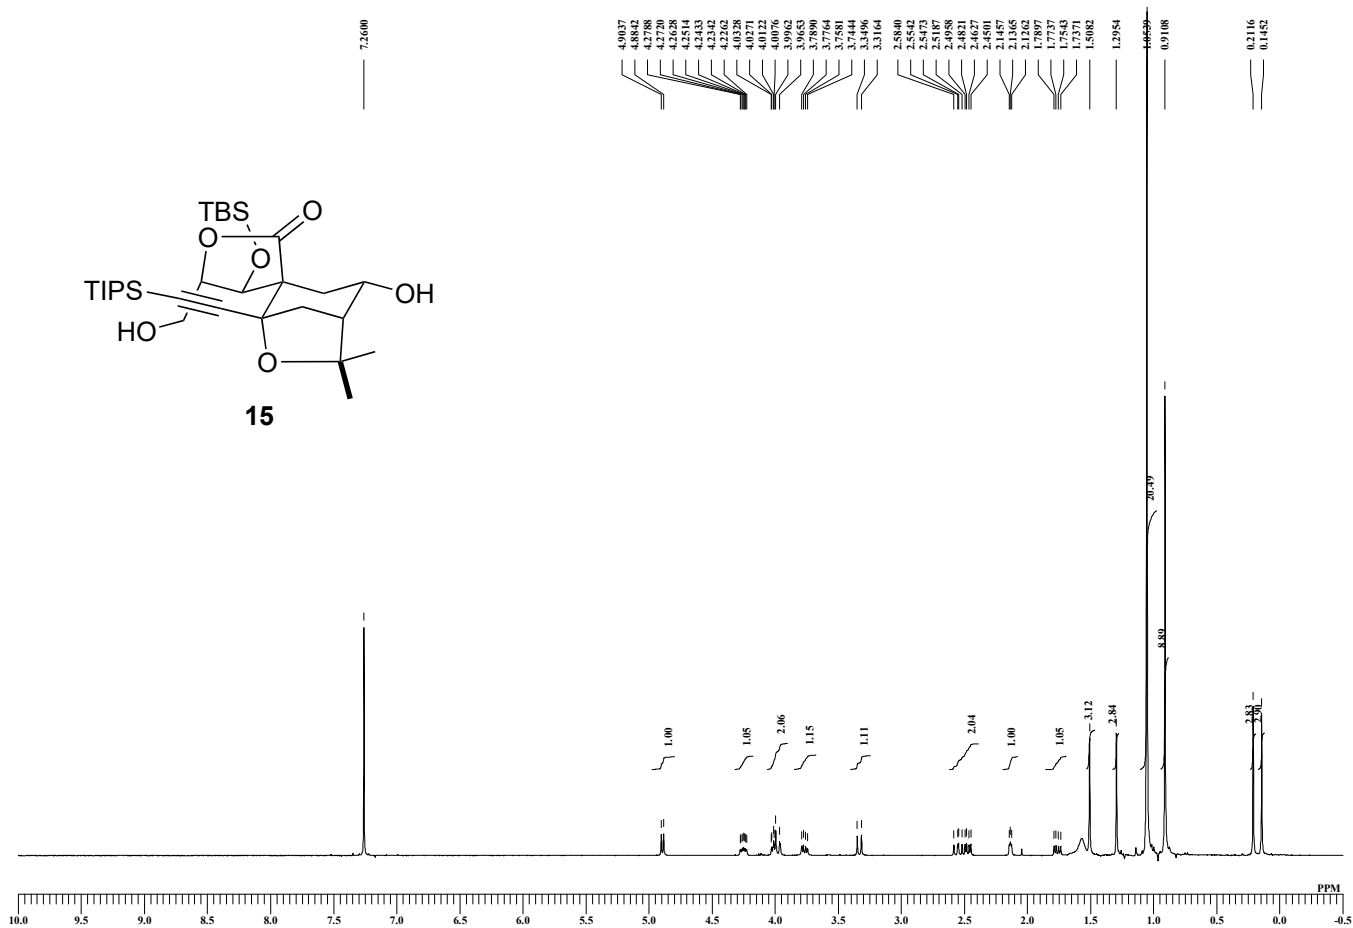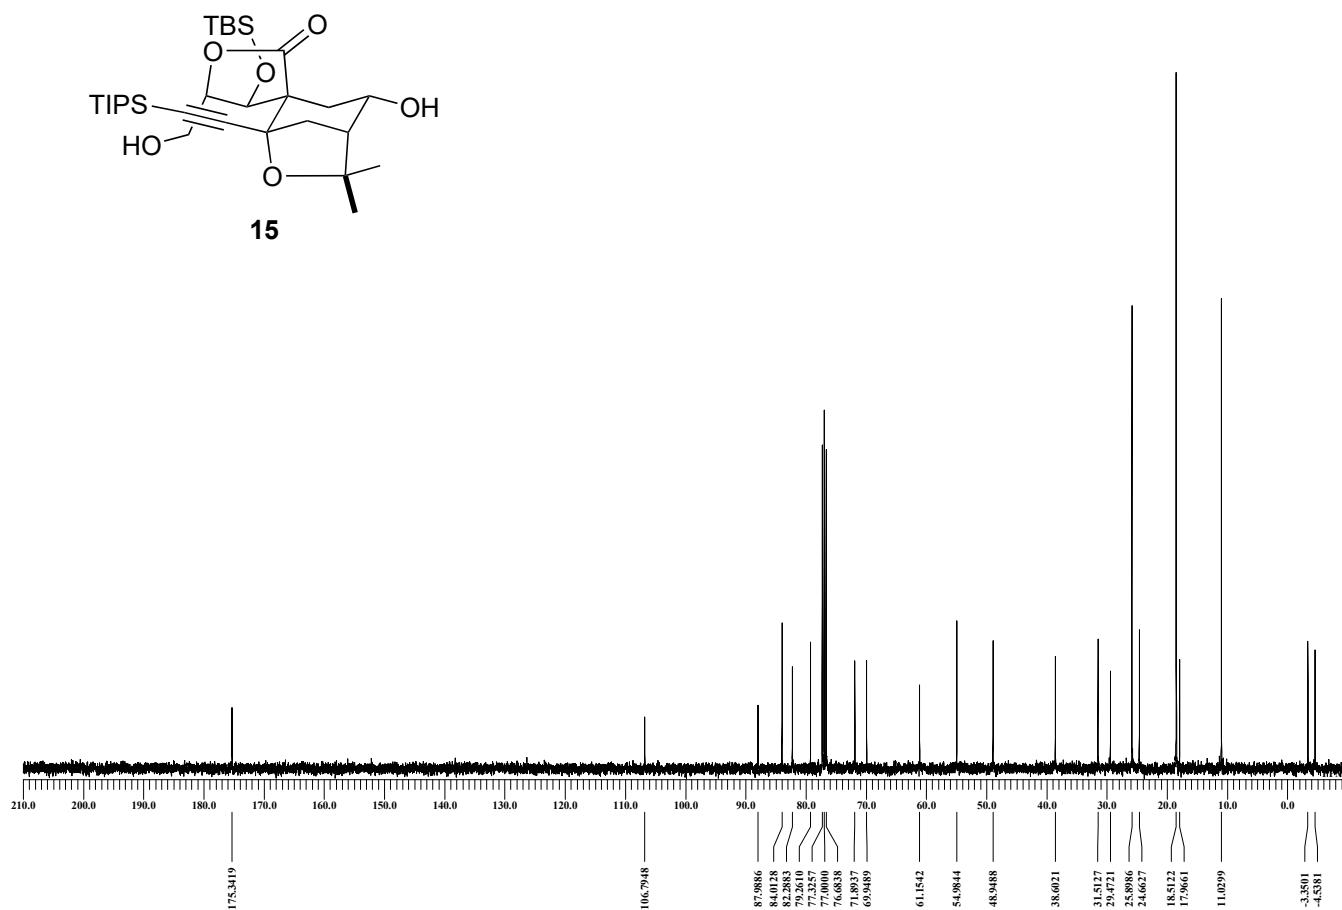

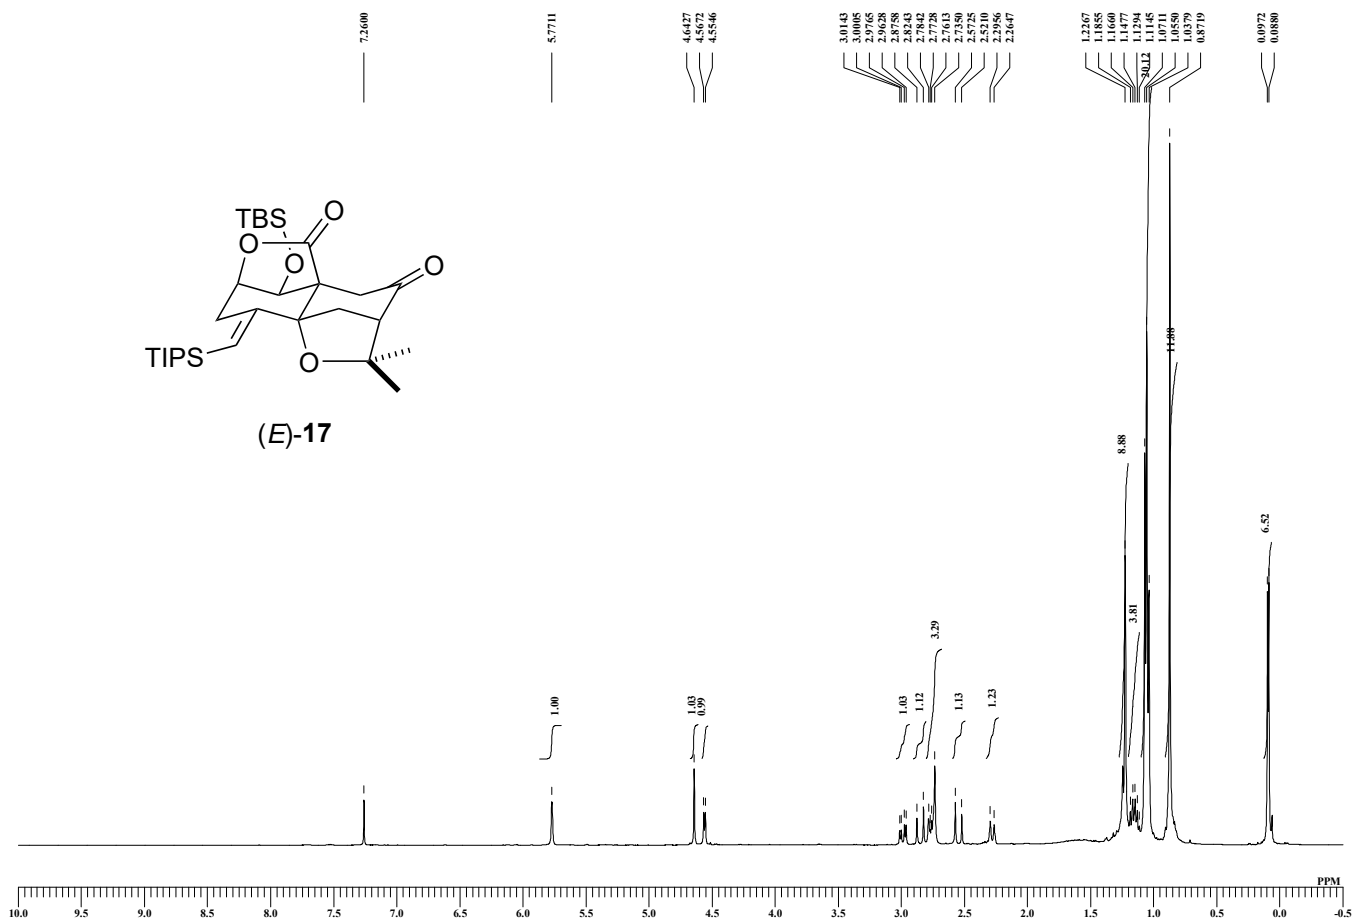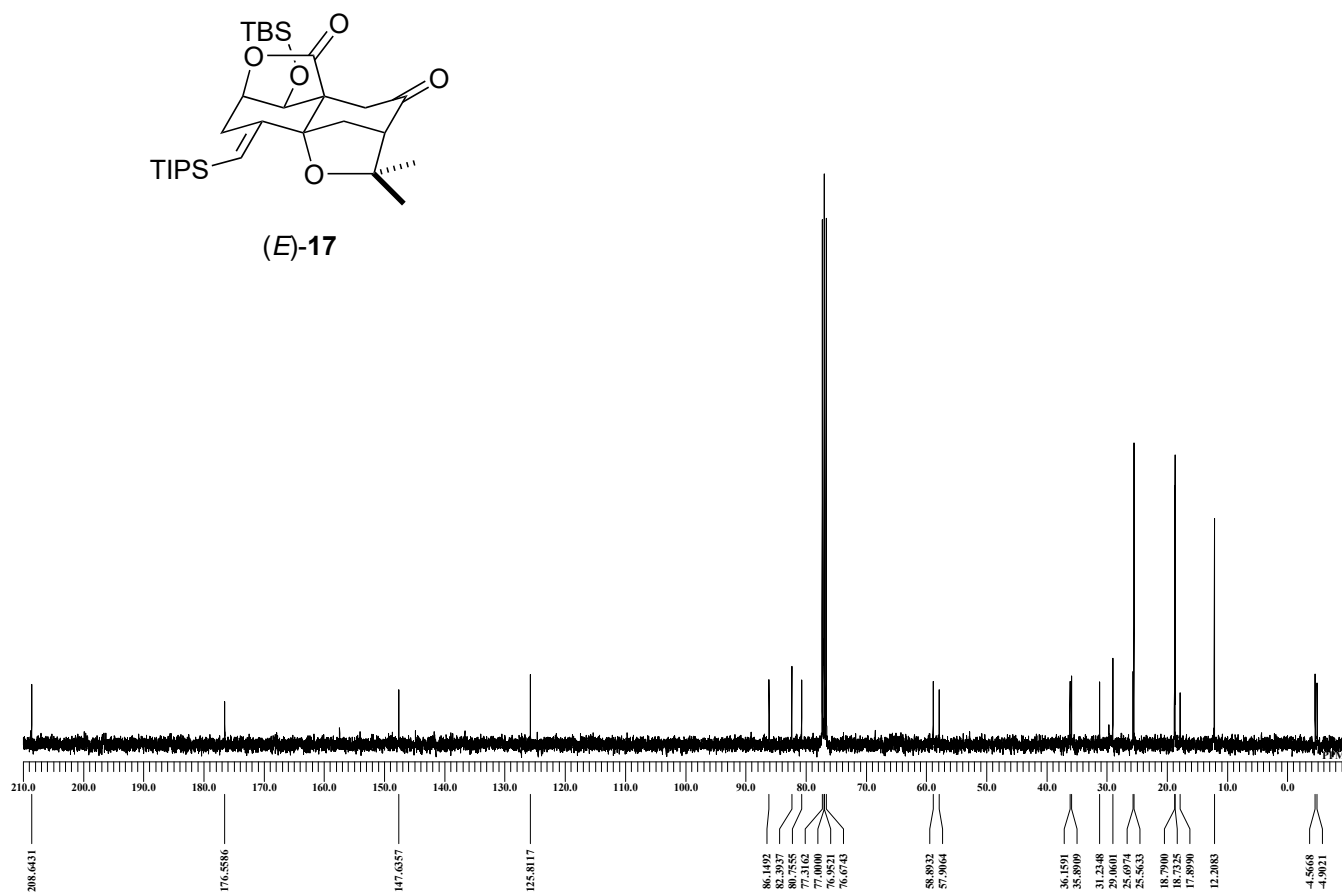

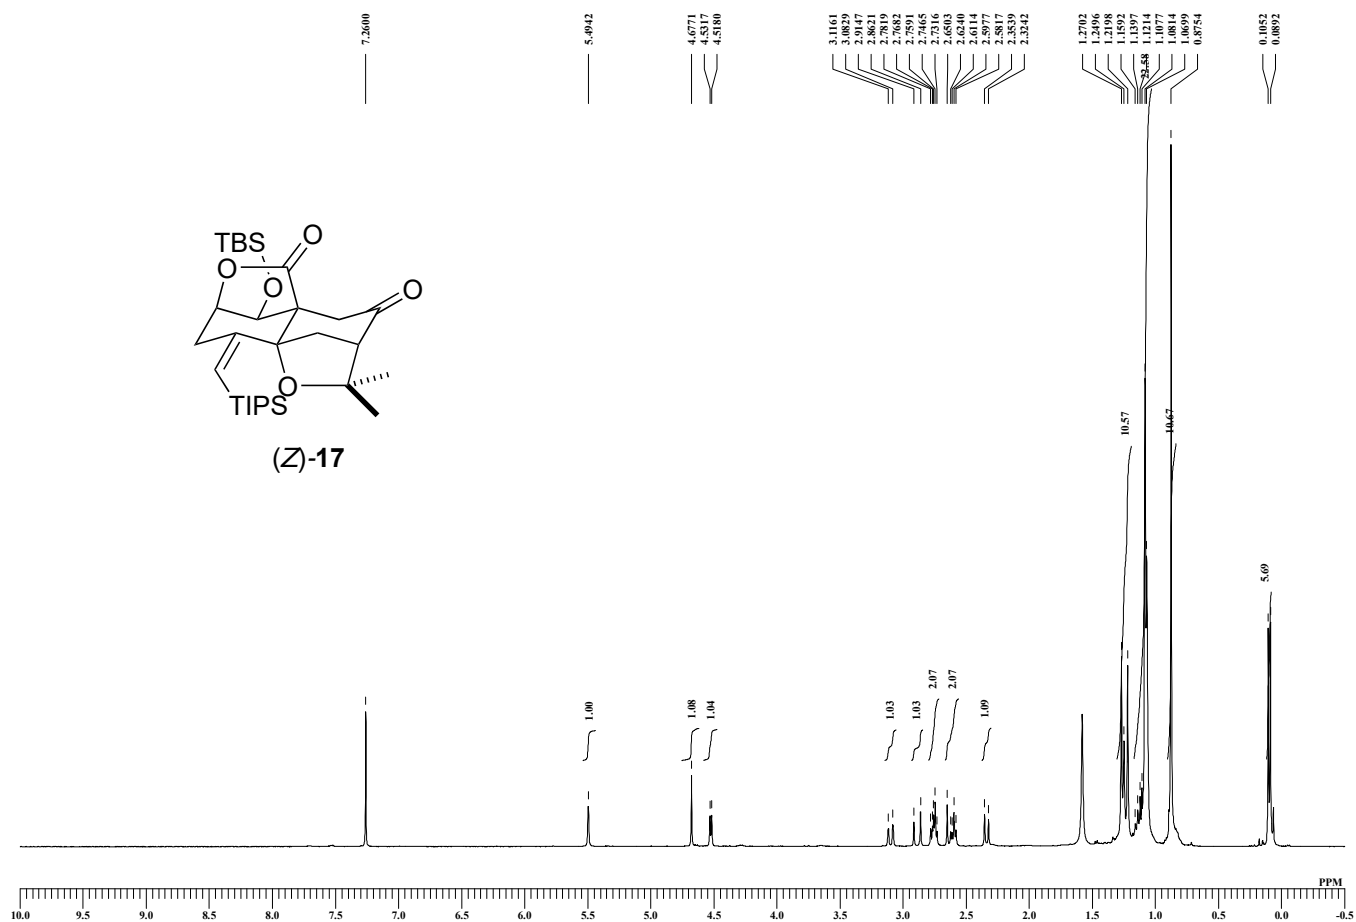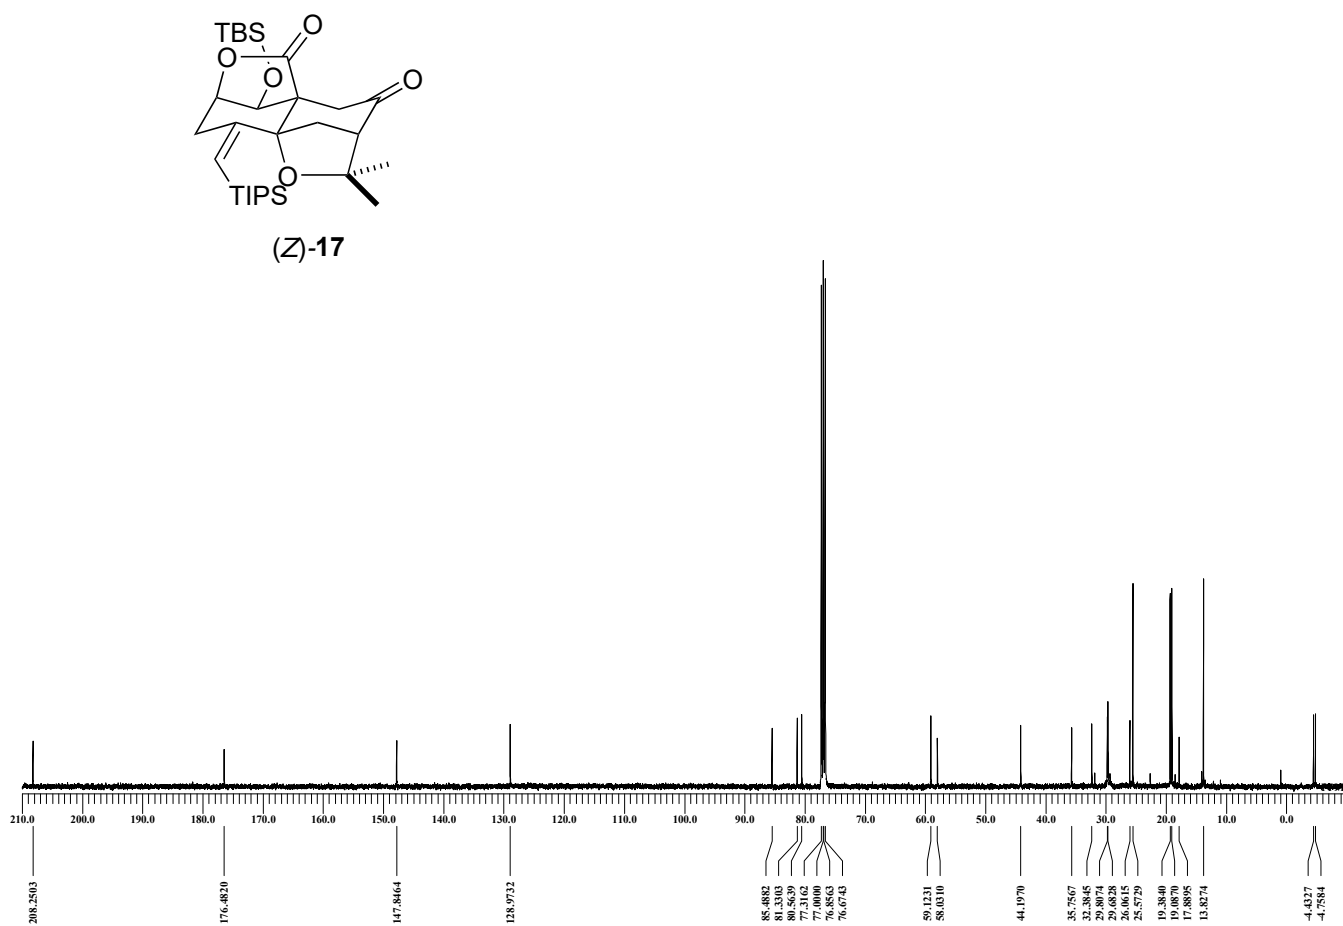

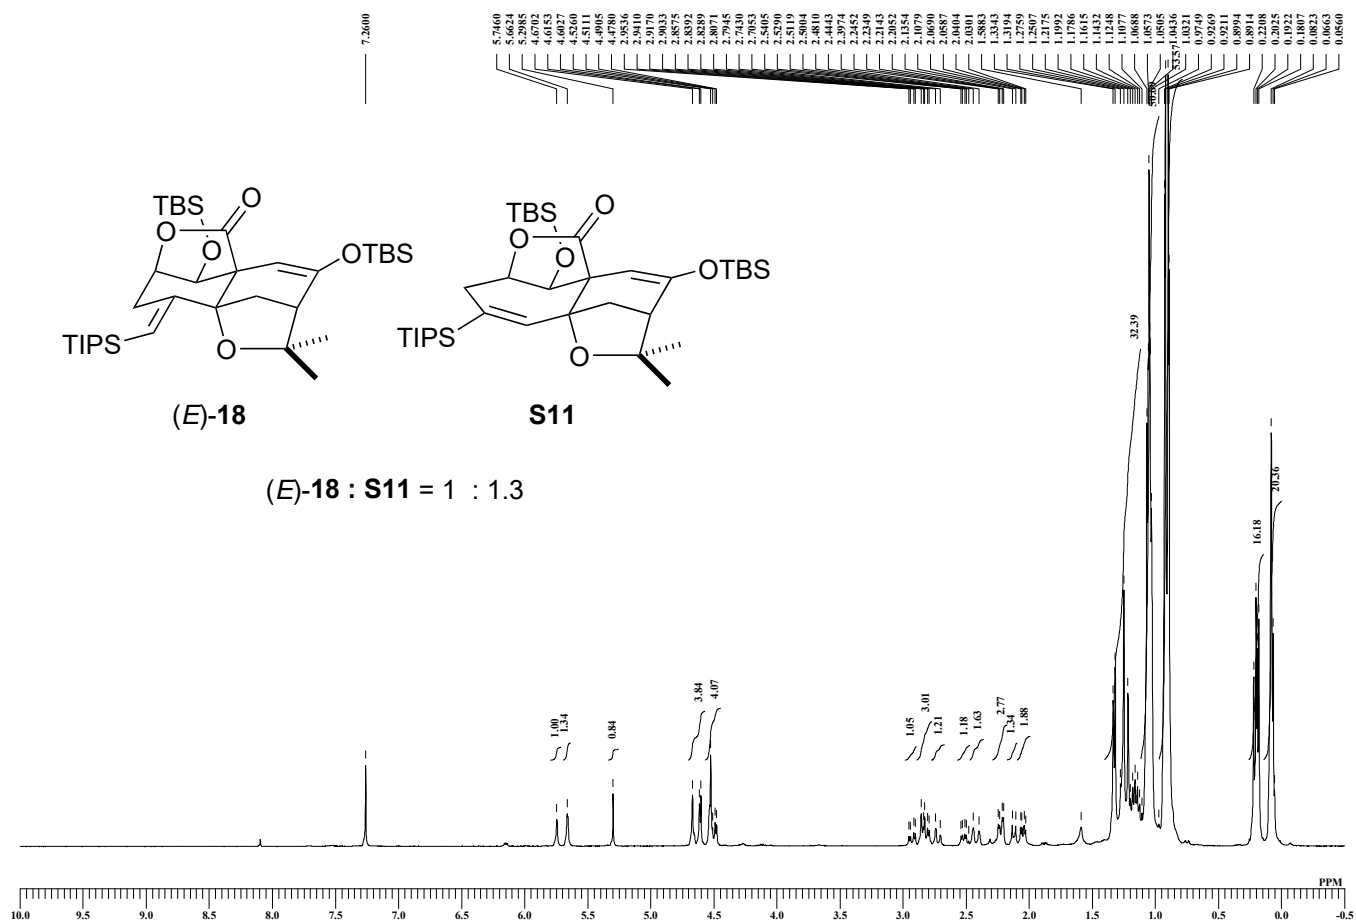



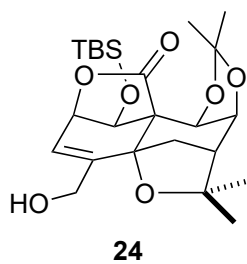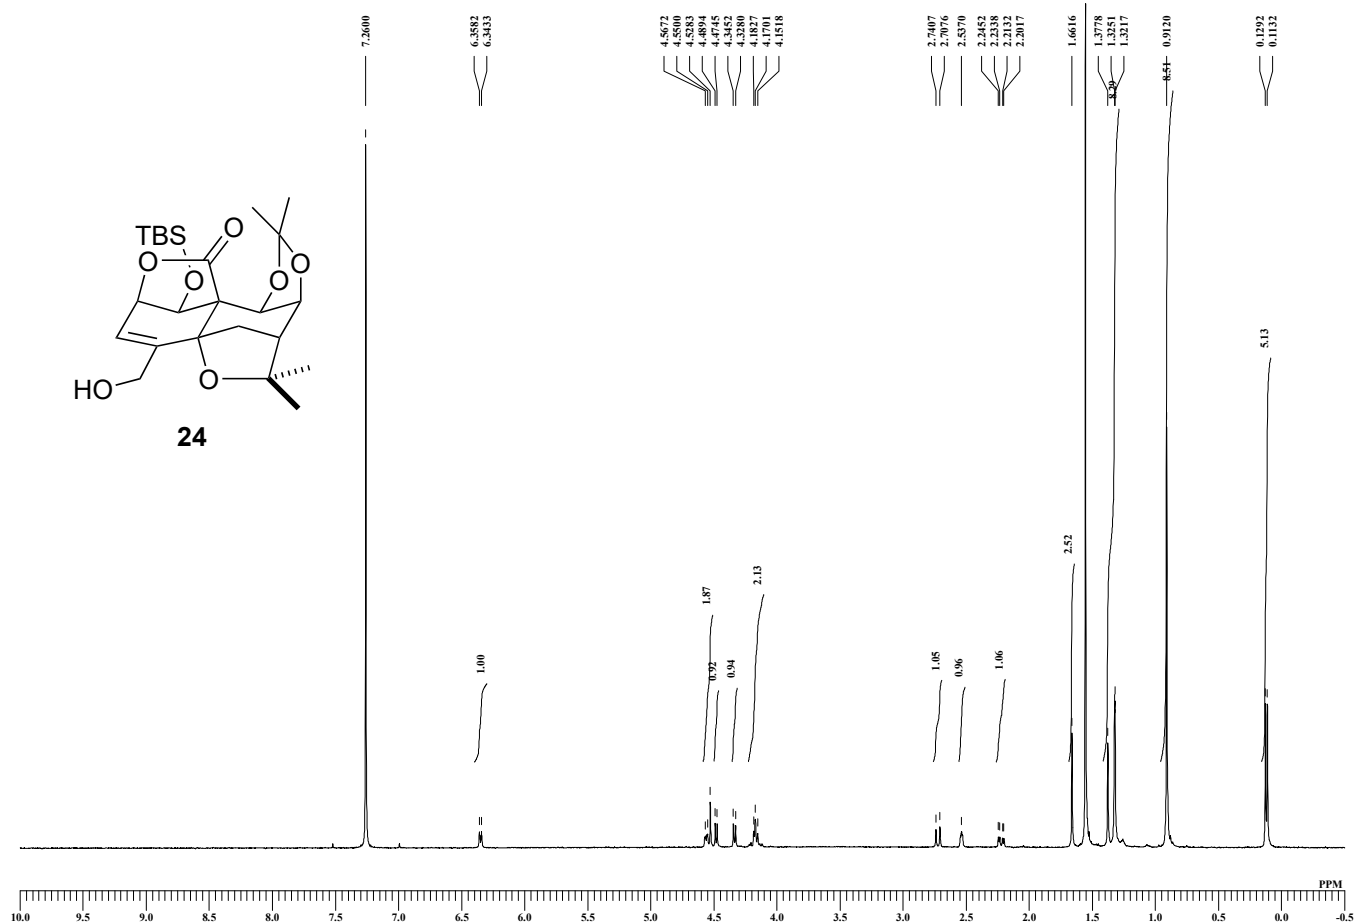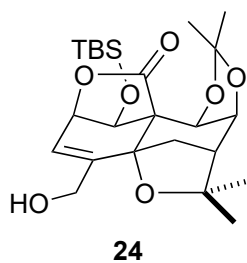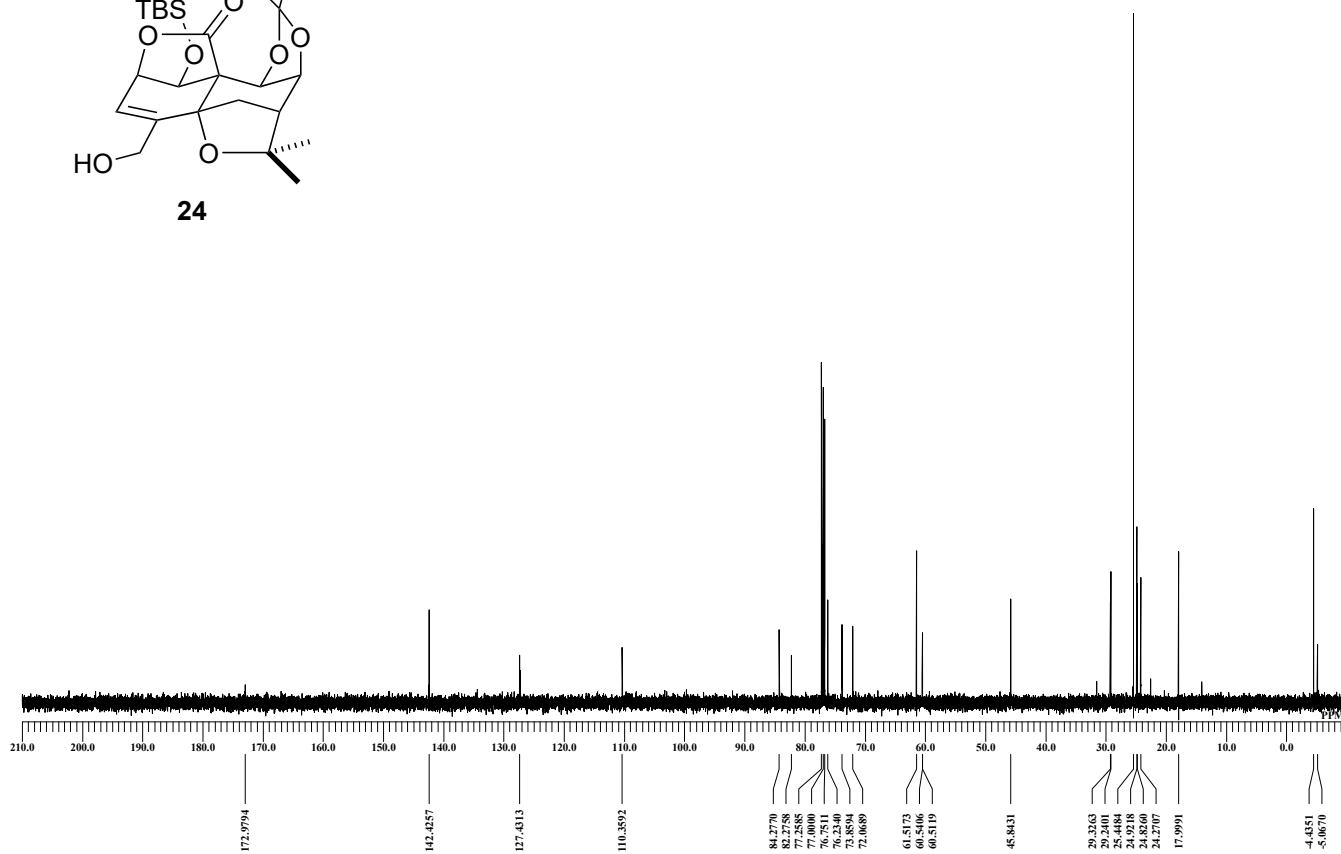



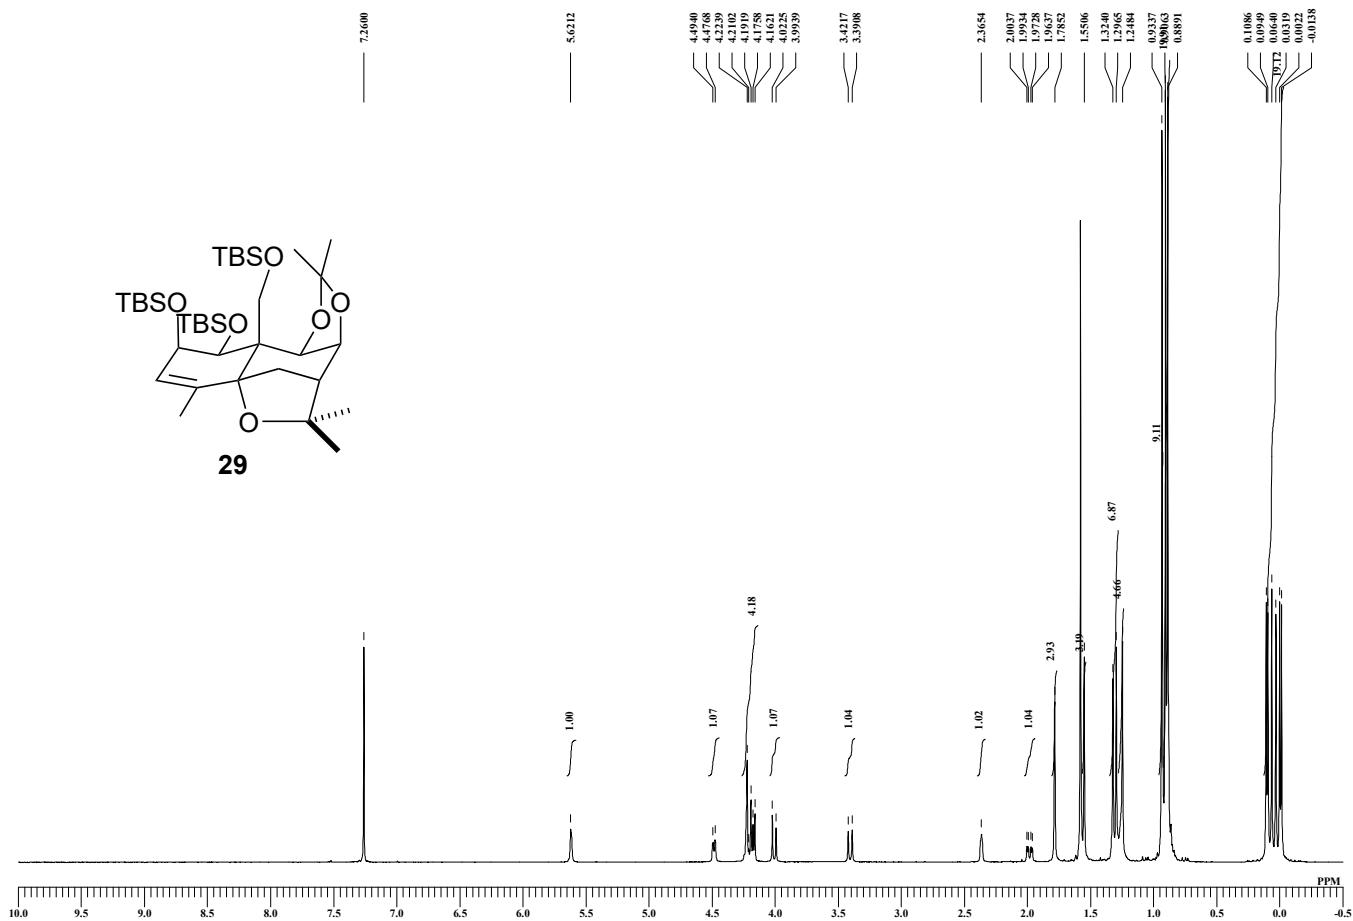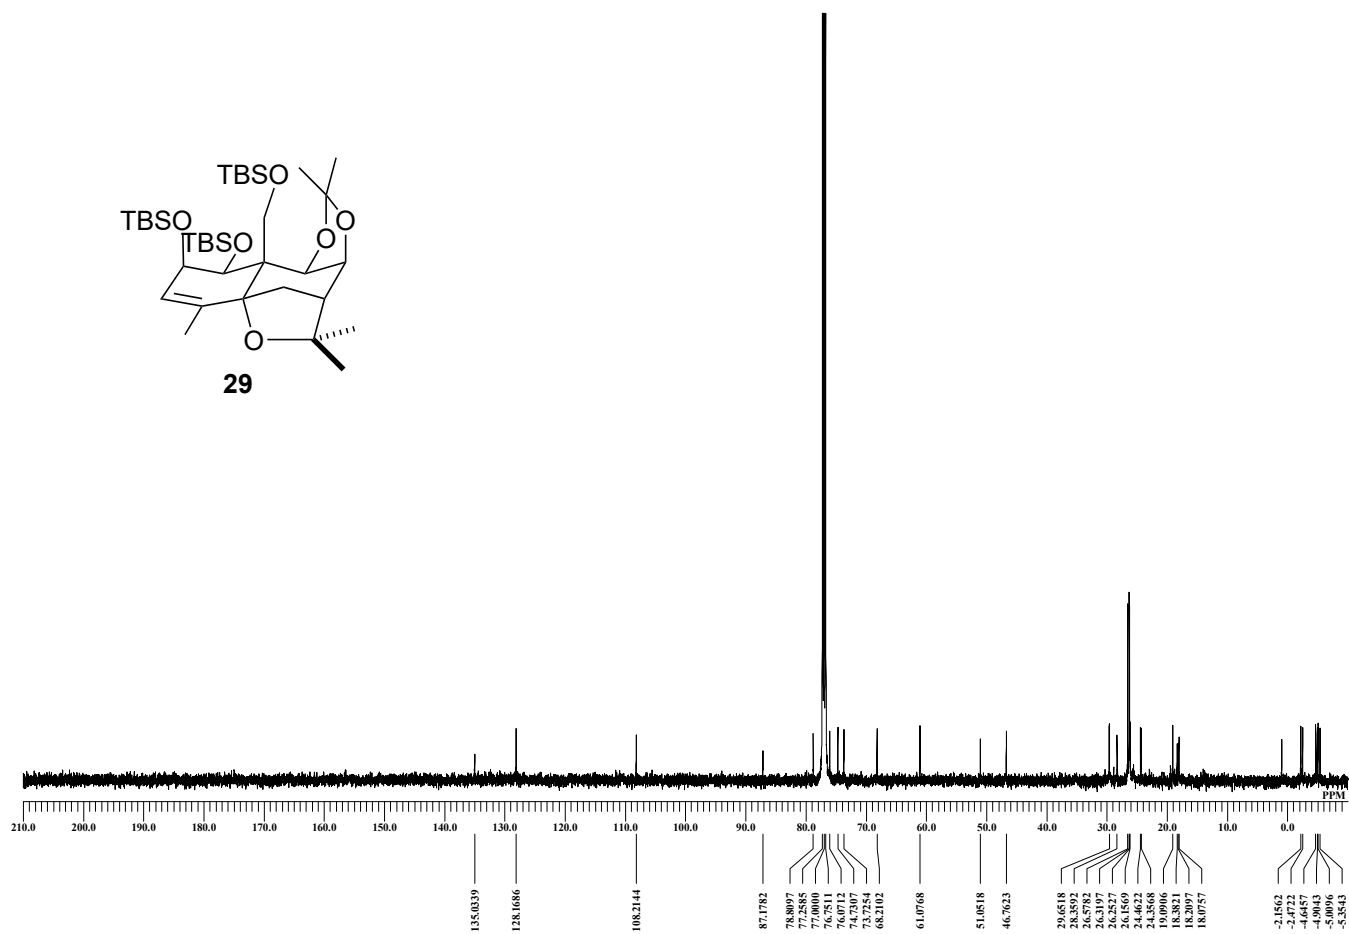

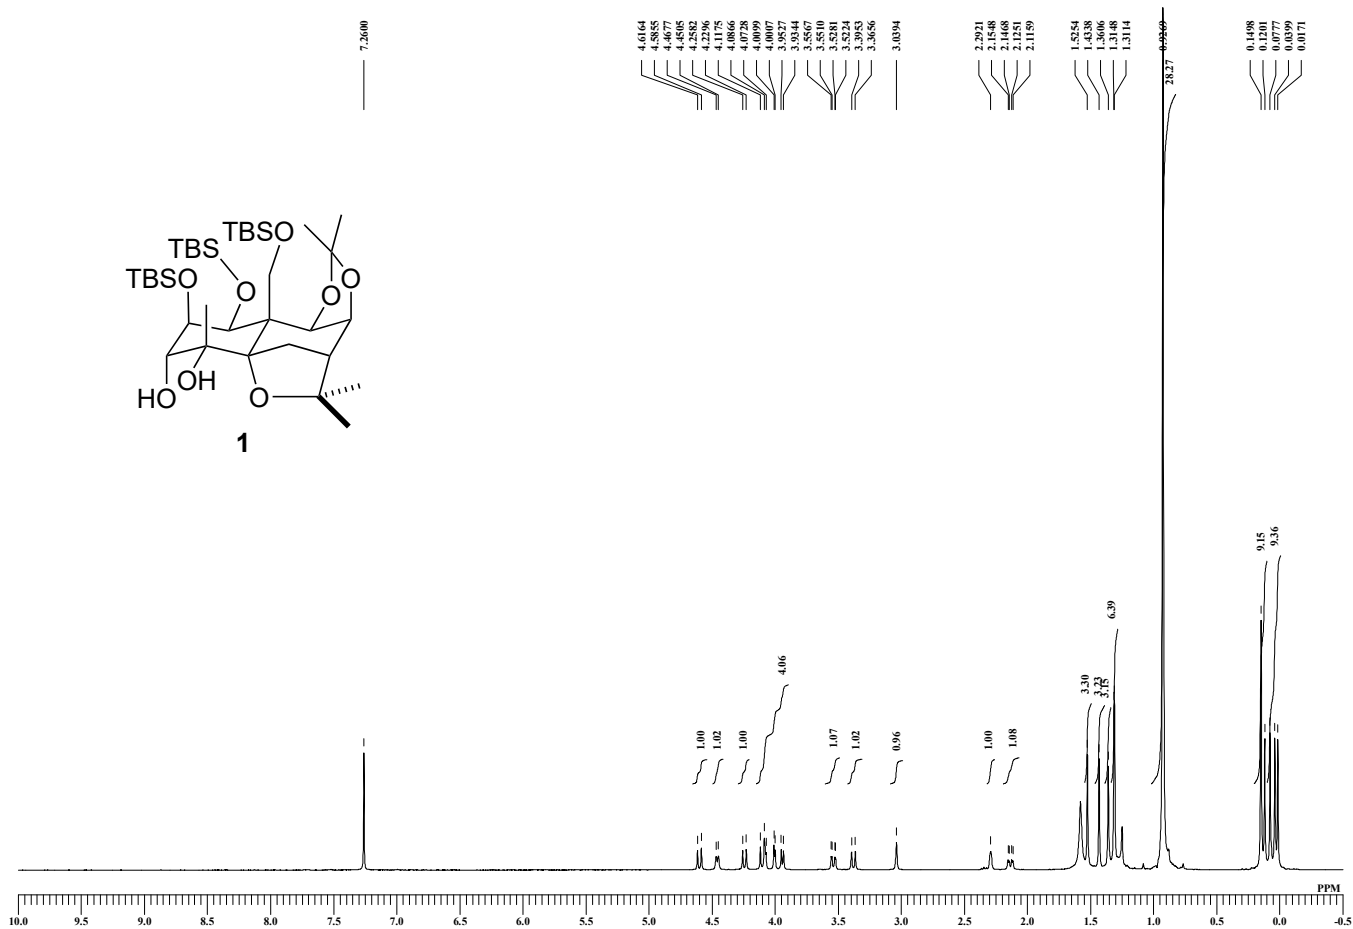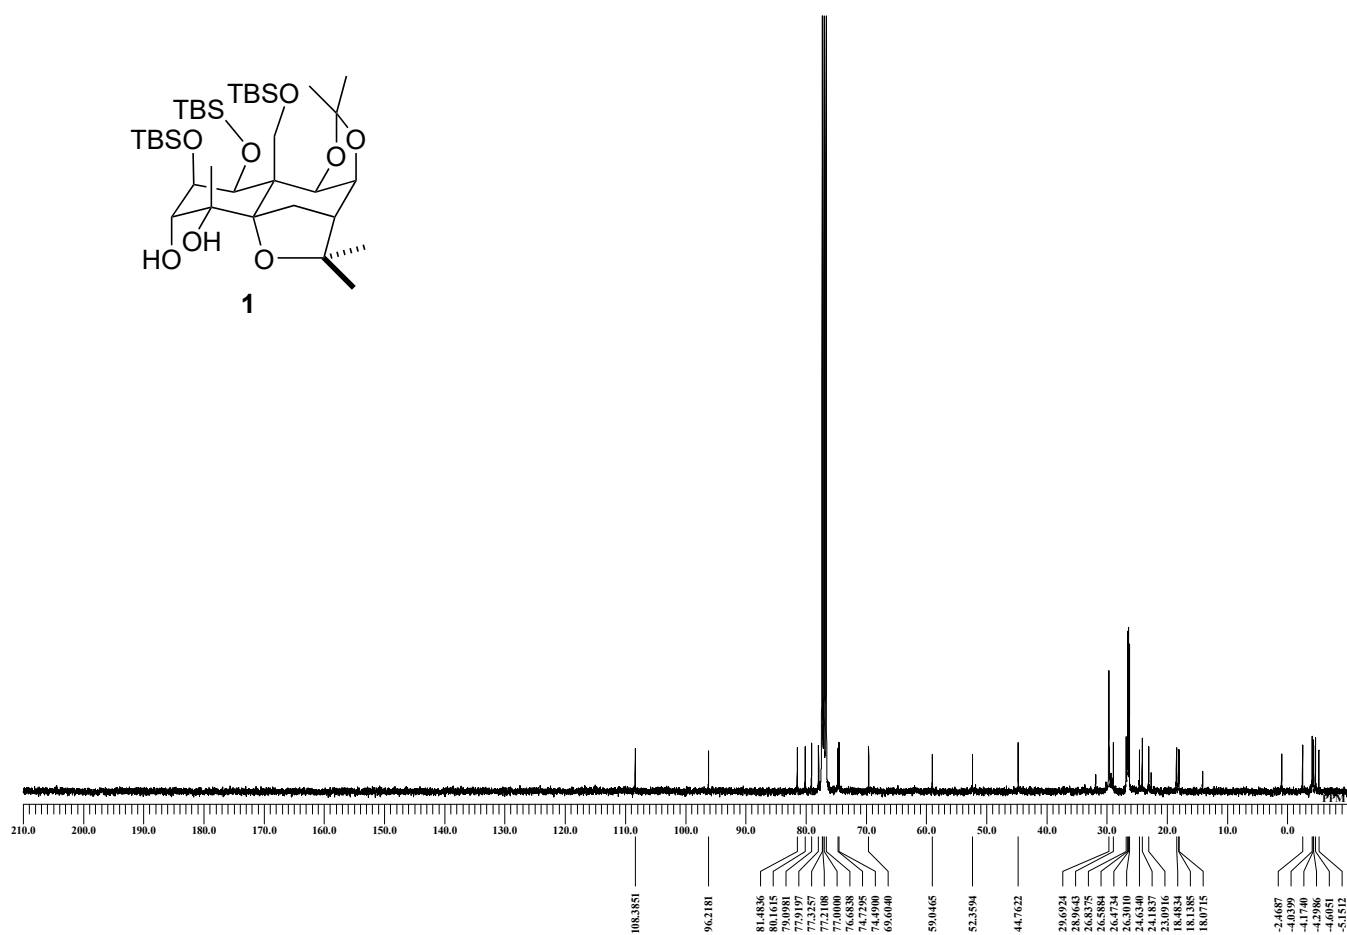

Supplement: c7cc00507e1.pdf [file c7cc00507e1.pdf]
